# Supplementary material
Source: PubMed Central journal article supplement (PMC6731654)
Supplement: pnas.1904895116.sapp.pdf [file pnas.1904895116.sapp.pdf]

Supporting Information Appendix

for

**Identification of a Uranium-Rhodium Triple Bond in a  
Heterometallic Cluster**

Genfeng Feng<sup>a</sup>, Mingxing Zhang<sup>a</sup>, Penglong Wang<sup>a</sup>, Shuao Wang<sup>b</sup>, Laurent Maron<sup>c,1</sup>, and  
Congqing Zhu<sup>a,1</sup>

<sup>a</sup>State Key Laboratory of Coordination Chemistry, Jiangsu Key Laboratory of Advanced Organic Materials, School of Chemistry and Chemical Engineering, Nanjing University, Nanjing, China;

<sup>b</sup>State Key Laboratory of Radiation Medicine and Protection, School for Radiological and interdisciplinary Sciences (RAD-X) and Collaborative Innovation Center of Radiation Medicine of Jiangsu Higher Education Institutions, Soochow University, Suzhou, China;

<sup>c</sup>LPCNO, CNRS & INSA, Université Paul Sabatier, 135 Avenue de Rangueil, Toulouse, France

<sup>1</sup>To whom correspondence may be addressed. Email: laurent.maron@irsamc.ups-tlse.fr or zcq@nju.edu.cn

**This PDF file includes:**

- 1. Materials and Methods**
- 2. Supporting Figures**
- 3. Single-Crystal X-Ray Diffraction Experiment**
- 4. Computational Methods**
- 5. References**

## 1. Materials and Methods

**General information:** All reactions were carried out using a Vigor Ar-atmosphere glove box (<1 ppm O<sub>2</sub>/H<sub>2</sub>O). Solvents were dried and degassed before use through a Mikrouna solvent drying system. Samples were carefully checked for purity and reproducibility of their data. Elemental analyses (C, H, N) were performed on a Vario EL III elemental analyser at Shanghai Institute of Organic Chemistry, the Chinese Academy of Sciences. The powder X-ray diffraction pattern (PXRD) measurements were carried out on a Philips X'pert MPD Pro X-ray diffractometer using Cu K $\alpha$  radiation ( $\lambda = 0.15418$  nm), and the X-ray tube was operated at 40 kV and 40 mA at room temperature. Magnetic susceptibility measurements on crystalline samples were carried out on a SQUID magnetometer at 0.1 T in the temperature range from 5 to 300 K. Absorption spectra were recorded on a Lambda 750 spectrometer at room temperature. X-ray photoelectron spectroscopy (XPS) measurements were carried out on an Axis Ultra imaging photoelectron spectrometer. Fourier Transform Infrared Spectra (FT-IR) (4000-400 cm<sup>-1</sup>) were collected on a Nicolet FT-IR 170X spectrophotometer at 25 °C using KBr plates. Complex **1** was synthesized according to a published method (1).

### Preparation of Complex 2

Complex **1** (284.0 mg, 0.37 mmol) was dissolved in a 20 mL vial with THF (5 mL), then a solution of [RhCl(COD)]<sub>2</sub> (183.0 mg, 0.37 mmol) in THF (5 mL) was added dropwise at room temperature. After shaking several times, the resulting mixture was allowed to stand undisturbed. Complex **2** was precipitated as brown crystals from the THF solution within 24 h at the same temperature. Separation of the target crystals was easier with purer precursor. The solvent was decanted and replaced twice with fresh THF. Pure crystalline **2** was obtained in 58% yield (261.0 mg). The recording of NMR spectra of **2** were prevented by its poor solubility. Therefore, the elemental analysis and powder X-ray diffraction were used to confirm the purity of the bulk samples. FT-IR (cm<sup>-1</sup>): 2953 (s), 2866 (s), 1460 (m), 1381 (w), 1340 (w), 1239 (w), 1158 (m), 1129 (m), 1078 (m), 928(m), 769 (m), 653 (m), 549 (m). Anal. Calcd (%) for C<sub>64</sub>H<sub>132</sub>Cl<sub>6</sub>N<sub>8</sub>P<sub>6</sub>Rh<sub>4</sub>U<sub>2</sub>: C, 33.42; H, 5.78; N, 4.87; Found: C, 33.81; H, 5.58; N, 4.43.

### Preparation of Complex 3

KC<sub>8</sub> (48.7 mg 0.36 mmol) was added to a suspension of **2** (147.0 mg, 0.06 mmol) in THF (5 ml) at ambient temperature. The mixture was stirred overnight. After removing THF *in vacuo*, the residual solid was extracted with toluene. Black crystals were grown from toluene solution at -35 °C in 2 days. Washing with cooled toluene afforded pure crystalline **3** in 26% yield (31.0 mg). The recording of NMR spectra of **3** were prevented by its poor solubility and the elemental analysis and powder X-ray diffraction were used to confirm the purity of the bulk samples. FT-IR (cm<sup>-1</sup>): 2914 (s), 2831 (s), 1450 (w), 1369 (w), 1232 (w), 1181 (m), 1020 (w), 912 (w), 752 (s), 630 (m), 536(m). Anal. Calcd (%) for C<sub>55</sub>H<sub>116</sub>N<sub>8</sub>P<sub>6</sub>Rh<sub>4</sub>U<sub>2</sub>: C, 33.65; H, 5.96; N, 5.71; Found: C, 33.40; H, 5.86; N, 5.63.

## 2. Supporting Figures

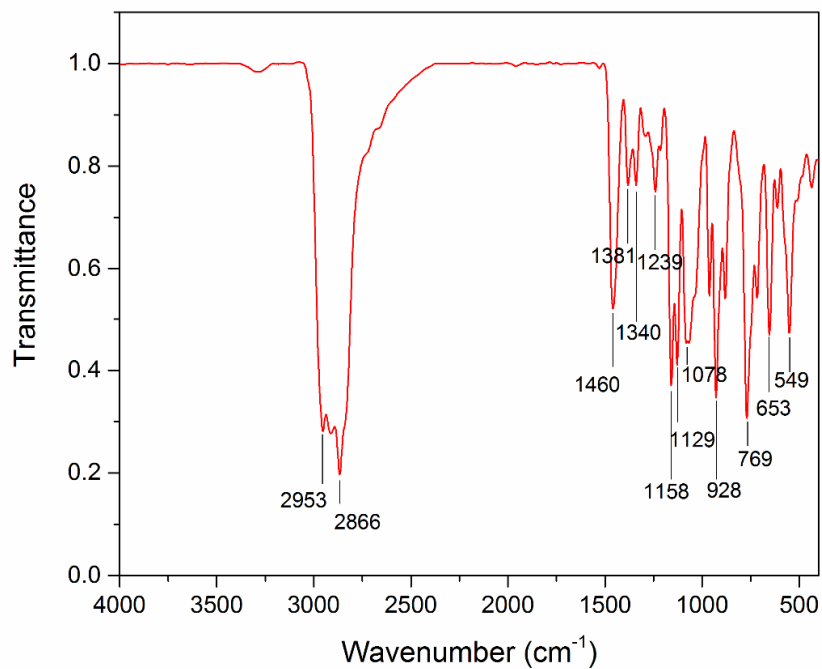

**Fig. S1.** FT-IR spectrum of complex 2

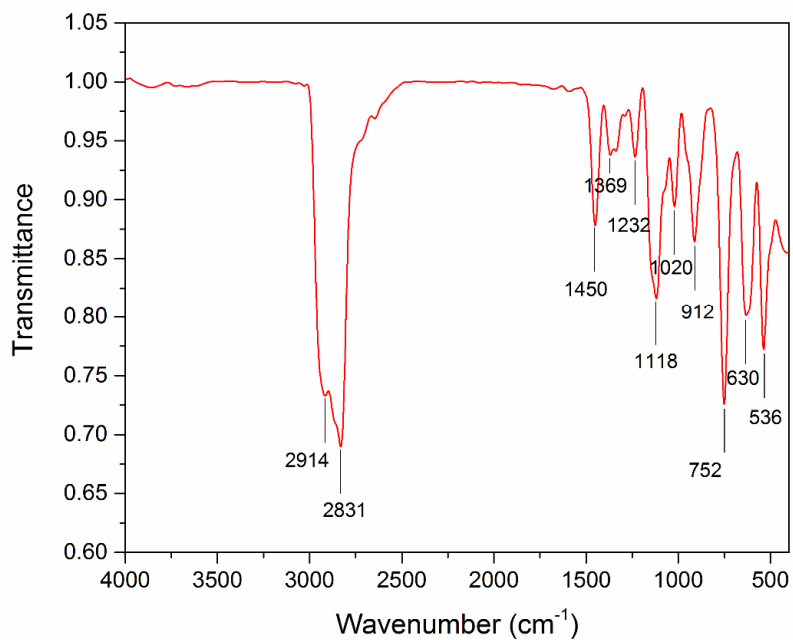

**Fig. S2.** FT-IR spectrum of complex 3.

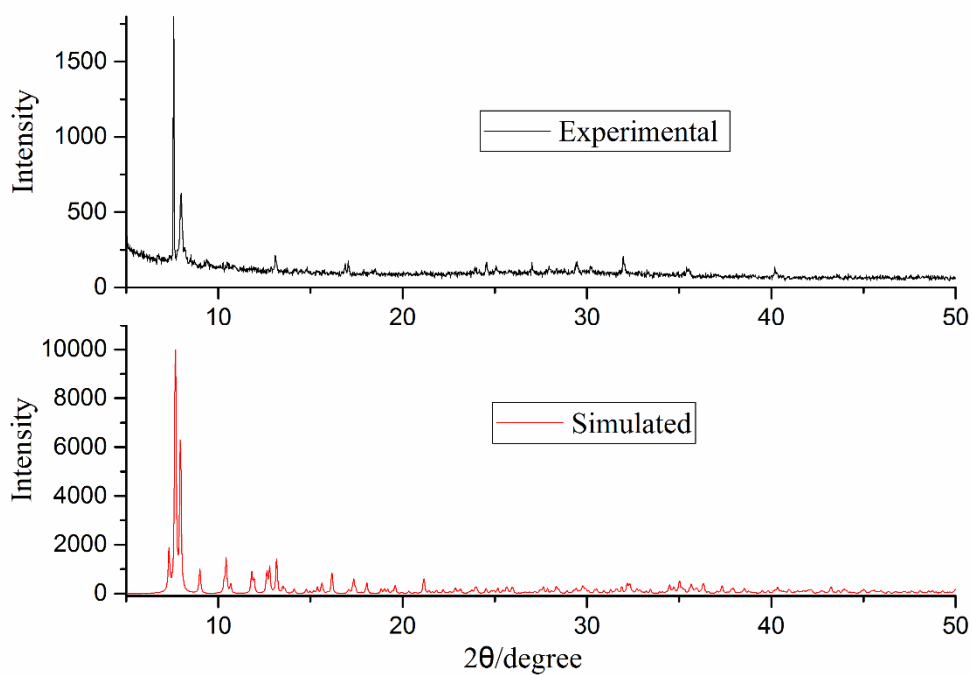

**Fig. S3.** PXRD patterns of **2** in the range from 5 to 50 degree.

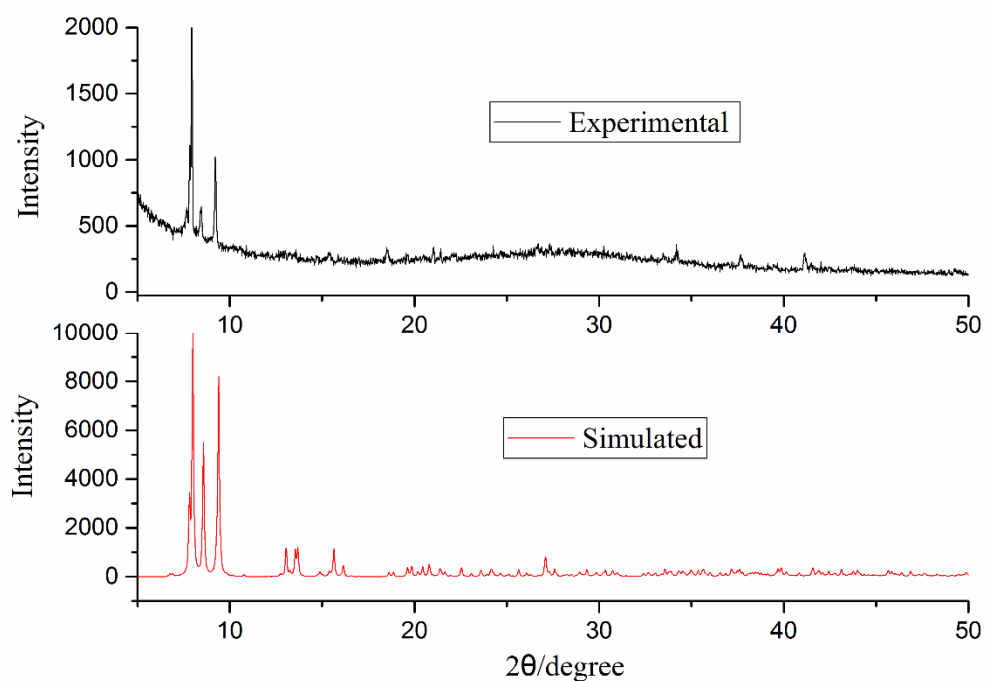

**Fig. S4.** PXRD patterns of **3** in the range from 5 to 50 degree.

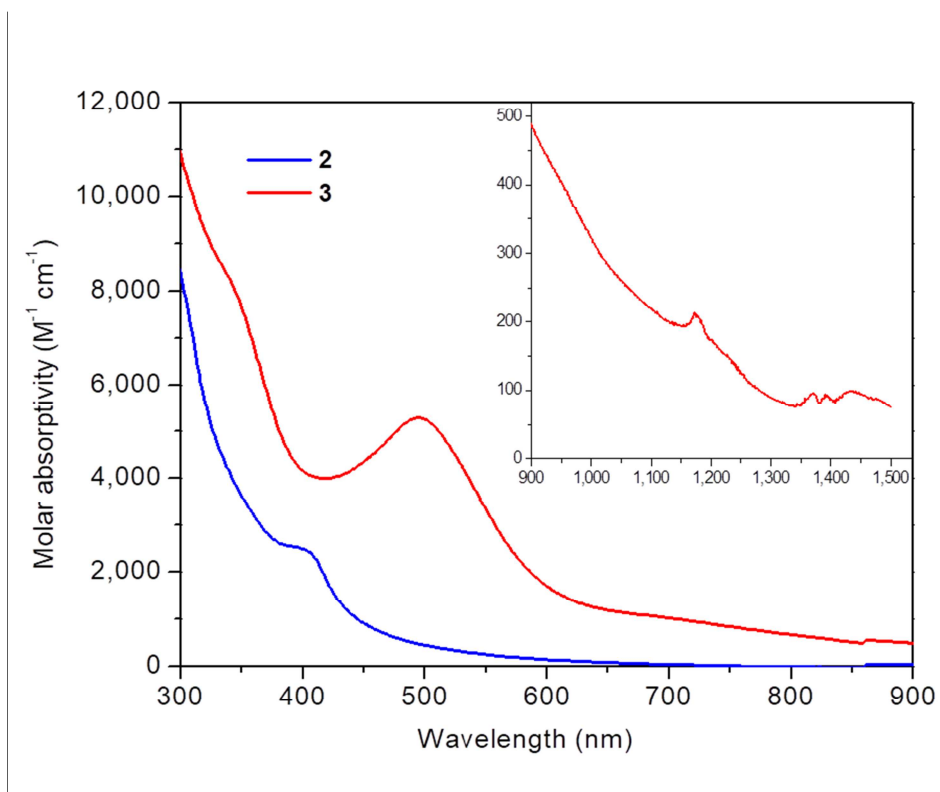

**Fig. S5.** UV-visible absorption spectra for **2** and **3** measured in tetrahydrofuran at room temperature. Inset: Near infrared absorption spectrum of complex **3**.

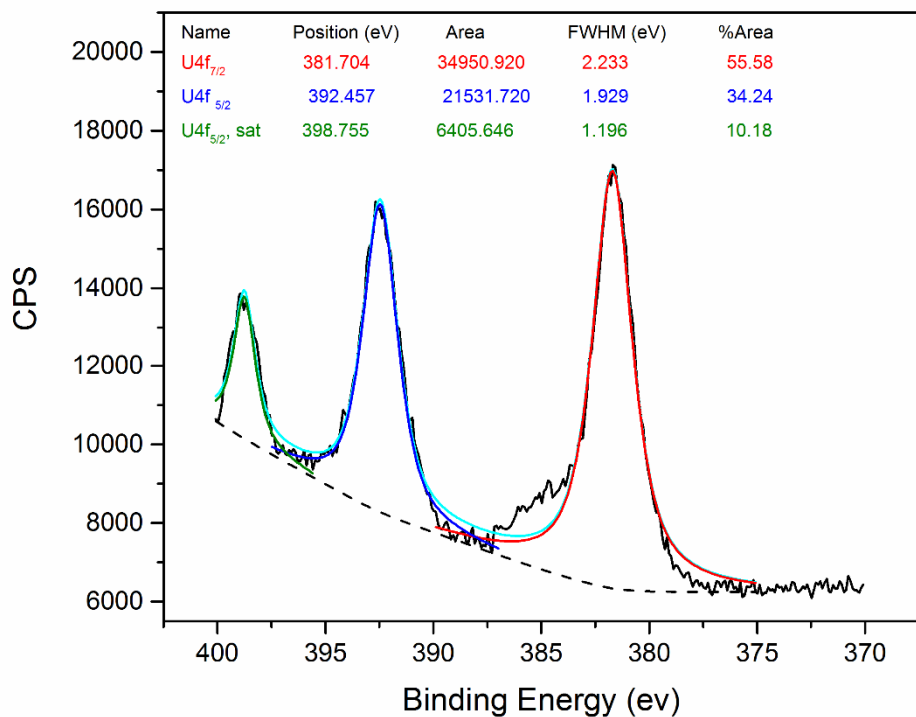

**Fig. S6.** XPS spectrum of U4f of complex **2**

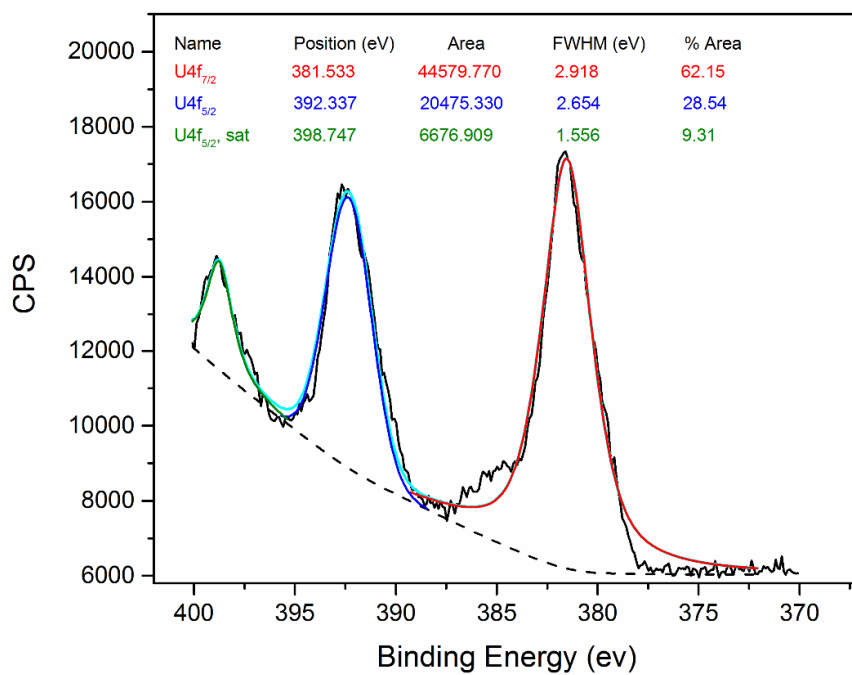

**Fig. S7.** XPS spectrum of U4f of complex **3**.

### 3. Single-Crystal X-Ray Diffraction Experiment

Single-crystal X-ray diffraction data for complexes **2** and **3** were collected at 123 K on a Bruker D8 CMOS detector using graphite-monochromated Mo K $\alpha$  radiation ( $\lambda = 0.71073 \text{ \AA}$ ). Integrations, cell refinement and data reduction were performed with the SAINT program (2). All structures were solved by direct methods and refined on  $F^2$  using full-matrix least-squares methods with SHELXTL version 6.10 (3). All non-hydrogen atoms were refined on  $F^2$  by full-matrix least-squares procedures with the use of anisotropic displacement parameters. All calculations were carried out with the SHELXTL PC program package. In complex **2**, fixed distance (DFIX) and pseudo-isotropic (ISOR) restraints were applied for the refinement of the disordered atoms. Similarity restraint (DELU) was used to constrain the displacement ellipsoids of the atoms. In complex **3**, the integral structure, including the heavy atoms, was disordered. Two alternative orientations for the heavy atoms and ligand were refined and resulted in site occupancies of 87.5% and 12.5%, respectively. Fixed distance (DFIX) was used to rationalize the bond parameters of the ligand. SIMU, DELU and ISOR restraints were applied for the refinement of the disordered ligand atoms. Evaluation of the CIF using the CheckCIF routine at [www.checkcif.iucr.org](http://www.checkcif.iucr.org) gave no A or B alert for complexes **2** and **3**. Details of the data collection and refinement for complexes **2** and **3** are given in Table S1. CCDC-1886167 (**2**) and 1886168 (**3**) contain the crystallographic data reported in this paper. These data can be obtained free of charge from The Cambridge Crystallographic Data Centre via [www.ccdc.cam.ac.uk/data-request/cif](http://www.ccdc.cam.ac.uk/data-request/cif).

**Table S1** Crystal data and structure refinements for complexes **2** and **3**

| Complex                                    | <b>2</b>                                                                                                        | <b>3</b>                                                                                      |
|--------------------------------------------|-----------------------------------------------------------------------------------------------------------------|-----------------------------------------------------------------------------------------------|
| Formula                                    | (C <sub>36</sub> H <sub>74</sub> Cl <sub>3</sub> N <sub>4</sub> OP <sub>3</sub> Rh <sub>2</sub> U) <sub>2</sub> | C <sub>55</sub> H <sub>116</sub> N <sub>8</sub> P <sub>6</sub> Rh <sub>4</sub> U <sub>2</sub> |
| Mr [g/mol]                                 | 2444.21                                                                                                         | 1963.07                                                                                       |
| Temp. [K]                                  | 123(2)                                                                                                          | 123(2)                                                                                        |
| Crystal system                             | Monoclinic                                                                                                      | Monoclinic                                                                                    |
| Space group                                | <i>P</i> 2 <sub>1</sub> / <i>c</i>                                                                              | <i>P</i> 2 <sub>1</sub> / <i>c</i>                                                            |
| <i>a</i> [Å]                               | 15.6600(6)                                                                                                      | 13.1220(10)                                                                                   |
| <i>b</i> [Å]                               | 13.1065(5)                                                                                                      | 13.5533(10)                                                                                   |
| <i>c</i> [Å]                               | 25.2326(10)                                                                                                     | 38.271(3)                                                                                     |
| $\alpha$ [°]                               | 90                                                                                                              | 90                                                                                            |
| $\beta$ [°]                                | 107.0390(10)                                                                                                    | 95.674(2)                                                                                     |
| $\gamma$ [°]                               | 90                                                                                                              | 90                                                                                            |
| Volume [Å <sup>3</sup> ]                   | 4951.6(3)                                                                                                       | 6773.0(9)                                                                                     |
| Z/D <sub>calcd.</sub> [g/cm <sup>3</sup> ] | 4/ 1.639                                                                                                        | 4/1.925                                                                                       |
| $\mu$ [mm <sup>-1</sup> ]                  | 4.210                                                                                                           | 5.899                                                                                         |
| F(000)                                     | 2416                                                                                                            | 3824                                                                                          |
| $\theta$ range/deg                         | 2.065 to 25.020                                                                                                 | 2.139 to 26.000                                                                               |
| Index ranges                               | -18 $\leq h \leq$ 14<br>-15 $\leq k \leq$ 15                                                                    | -16 $\leq h \leq$ 12<br>-16 $\leq k \leq$ 16                                                  |

|                                                     |                                                     |                                                     |
|-----------------------------------------------------|-----------------------------------------------------|-----------------------------------------------------|
|                                                     | $-30 \leq I \leq 30$                                | $-47 \leq I \leq 47$                                |
| Collected data                                      | 35239                                               | 47955                                               |
| Unique data                                         | 8748 [R(int) = 0.0564]                              | 13278 [R(int) = 0.0703]                             |
| Completeness                                        | 99.9 %                                              | 99.7 %                                              |
| Data/parameters                                     | 8748 / 466                                          | 13278 / 1223                                        |
| GOF on F <sup>2</sup>                               | 1.052                                               | 1.034                                               |
| Final R indices [I > 2σ(I)]                         | R <sub>1</sub> = 0.0503<br>wR <sub>2</sub> = 0.1235 | R <sub>1</sub> = 0.0613<br>wR <sub>2</sub> = 0.1462 |
| R indices (all data)                                | R <sub>1</sub> = 0.0697<br>wR <sub>2</sub> = 0.1334 | R <sub>1</sub> = 0.0711<br>wR <sub>2</sub> = 0.1523 |
| Largest diff. peak and hole<br>[e·Å <sup>-3</sup> ] | 2.261 and -1.162                                    | 3.180 and -2.815                                    |

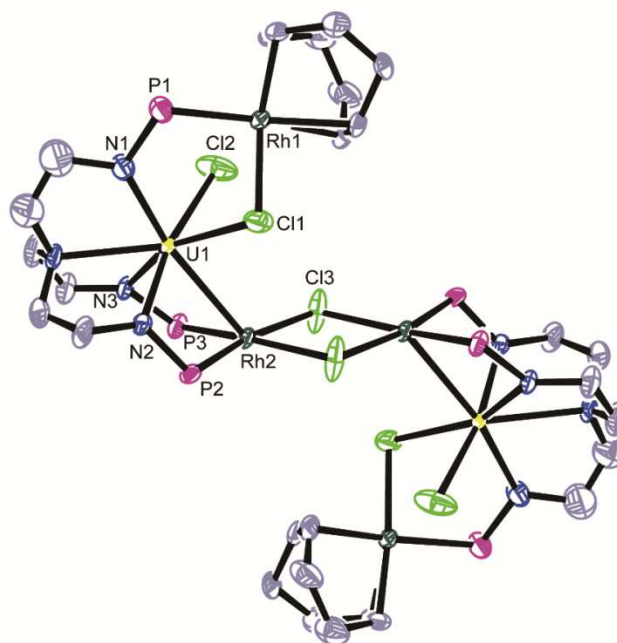

**Fig. S8.** Crystal structure of complex **2**. Thermal ellipsoids are drawn at 50% probability. Hydrogen atoms and isopropyl moieties in P<sup>i</sup>Pr<sub>2</sub> are omitted for clarity.

**Table S2** Bond lengths (Å) and angles [°] for complex **2**

|             |           |             |           |
|-------------|-----------|-------------|-----------|
| C(1)-C(2)   | 1.387(13) | C(1)-N(4)   | 1.467(14) |
| C(2)-N(1)   | 1.517(15) | C(3)-N(4)   | 1.444(13) |
| C(3)-C(4)   | 1.499(15) | C(4)-N(2)   | 1.459(11) |
| C(5)-N(4)   | 1.477(13) | C(5)-C(6)   | 1.490(14) |
| C(6)-N(3)   | 1.442(11) | C(11)-C(12) | 1.347(16) |
| C(11)-C(18) | 1.522(17) | C(11)-Rh(1) | 2.192(9)  |
| C(12)-C(13) | 1.520(14) | C(12)-Rh(1) | 2.228(9)  |
| C(13)-C(14) | 1.525(15) | C(14)-C(15) | 1.524(14) |
| C(15)-C(16) | 1.409(13) | C(15)-Rh(1) | 2.099(8)  |



|                   |           |                     |           |
|-------------------|-----------|---------------------|-----------|
| C(16)-C(17)       | 1.501(14) | C(16)-Rh(1)         | 2.103(9)  |
| C(17)-C(18)       | 1.536(15) | C(19)-C(20)         | 1.47(2)   |
| C(19)-C(21)       | 1.549(16) | C(19)-P(1)          | 1.845(12) |
| C(22)-C(23)       | 1.515(16) | C(22)-C(24)         | 1.534(19) |
| C(22)-P(1)        | 1.876(12) | C(25)-C(26)         | 1.501(14) |
| C(25)-C(27)       | 1.549(13) | C(25)-P(3)          | 1.906(10) |
| C(28)-C(30)       | 1.519(14) | C(28)-C(29)         | 1.548(15) |
| C(28)-P(3)        | 1.865(10) | C(31)-C(33)         | 1.471(12) |
| C(31)-C(32)       | 1.472(12) | C(31)-P(2)          | 1.870(10) |
| C(34)-C(36)       | 1.515(12) | C(34)-C(35)         | 1.542(14) |
| C(34)-P(2)        | 1.869(10) | O(1)-C(40)          | 1.4433    |
| Cl(1)-Rh(1)       | 2.431(3)  | Cl(1)-U(1)          | 2.780(2)  |
| Cl(2)-U(1)        | 2.686(3)  | Cl(3)-Rh(2)         | 2.391(2)  |
| Cl(3)-Rh(2)#1     | 2.416(2)  | N(1)-P(1)           | 1.672(8)  |
| N(1)-U(1)         | 2.347(8)  | N(2)-P(2)           | 1.651(7)  |
| N(2)-U(1)         | 2.265(7)  | N(3)-P(3)           | 1.665(7)  |
| N(3)-U(1)         | 2.280(7)  | N(4)-U(1)           | 2.652(7)  |
| P(1)-Rh(1)        | 2.326(3)  | P(2)-Rh(2)          | 2.282(2)  |
| P(2)-U(1)         | 3.119(2)  | P(3)-Rh(2)          | 2.276(2)  |
| P(3)-U(1)         | 3.111(2)  | Rh(2)-Cl(3)#1       | 2.416(2)  |
| Rh(2)-U(1)        | 2.9609(7) |                     |           |
| C(2)-C(1)-N(4)    | 119.2(11) | C(1)-C(2)-N(1)      | 111.5(11) |
| N(4)-C(3)-C(4)    | 112.6(9)  | N(2)-C(4)-C(3)      | 108.0(8)  |
| N(4)-C(5)-C(6)    | 111.5(8)  | N(3)-C(6)-C(5)      | 108.6(8)  |
| C(12)-C(11)-C(18) | 125.7(10) | C(12)-C(11)-Rh(1)   | 73.7(6)   |
| C(18)-C(11)-Rh(1) | 107.2(7)  | C(11)-C(12)-C(13)   | 123.7(12) |
| C(11)-C(12)-Rh(1) | 70.8(6)   | C(13)-C(12)-Rh(1)   | 111.8(7)  |
| C(12)-C(13)-C(14) | 111.6(9)  | C(15)-C(14)-C(13)   | 112.4(9)  |
| C(16)-C(15)-C(14) | 126.1(9)  | C(16)-C(15)-Rh(1)   | 70.6(5)   |
| C(14)-C(15)-Rh(1) | 111.7(6)  | C(15)-C(16)-C(17)   | 124.7(9)  |
| C(15)-C(16)-Rh(1) | 70.3(5)   | C(17)-C(16)-Rh(1)   | 115.3(7)  |
| C(16)-C(17)-C(18) | 111.7(9)  | C(11)-C(18)-C(17)   | 113.9(10) |
| C(20)-C(19)-C(21) | 110.3(14) | C(20)-C(19)-P(1)    | 111.0(9)  |
| C(21)-C(19)-P(1)  | 113.9(9)  | C(23)-C(22)-C(24)   | 110.3(11) |
| C(23)-C(22)-P(1)  | 121.6(11) | C(24)-C(22)-P(1)    | 108.9(7)  |
| C(26)-C(25)-C(27) | 110.7(9)  | C(26)-C(25)-P(3)    | 117.8(8)  |
| C(27)-C(25)-P(3)  | 110.9(7)  | C(30)-C(28)-C(29)   | 109.5(9)  |
| C(30)-C(28)-P(3)  | 111.4(7)  | C(29)-C(28)-P(3)    | 116.5(8)  |
| C(33)-C(31)-C(32) | 109.9(9)  | C(33)-C(31)-P(2)    | 111.8(8)  |
| C(32)-C(31)-P(2)  | 119.0(9)  | C(36)-C(34)-C(35)   | 110.2(8)  |
| C(36)-C(34)-P(2)  | 116.3(7)  | C(35)-C(34)-P(2)    | 112.8(7)  |
| Rh(1)-Cl(1)-U(1)  | 91.89(8)  | Rh(2)-Cl(3)-Rh(2)#1 | 102.17(9) |
| C(2)-N(1)-P(1)    | 113.4(7)  | C(2)-N(1)-U(1)      | 123.9(7)  |

|                    |            |                     |            |
|--------------------|------------|---------------------|------------|
| P(1)-N(1)-U(1)     | 122.1(4)   | C(4)-N(2)-P(2)      | 128.6(7)   |
| C(4)-N(2)-U(1)     | 123.6(6)   | P(2)-N(2)-U(1)      | 104.5(3)   |
| C(6)-N(3)-P(3)     | 128.7(6)   | C(6)-N(3)-U(1)      | 127.4(6)   |
| P(3)-N(3)-U(1)     | 103.0(3)   | C(3)-N(4)-C(1)      | 109.4(9)   |
| C(3)-N(4)-C(5)     | 114.1(9)   | C(1)-N(4)-C(5)      | 108.3(9)   |
| C(3)-N(4)-U(1)     | 109.5(5)   | C(1)-N(4)-U(1)      | 111.5(6)   |
| C(5)-N(4)-U(1)     | 104.0(6)   | N(1)-P(1)-C(19)     | 105.5(5)   |
| N(1)-P(1)-C(22)    | 108.2(5)   | C(19)-P(1)-C(22)    | 103.4(7)   |
| N(1)-P(1)-Rh(1)    | 110.8(3)   | C(19)-P(1)-Rh(1)    | 115.1(5)   |
| C(22)-P(1)-Rh(1)   | 113.2(4)   | N(2)-P(2)-C(34)     | 104.3(4)   |
| N(2)-P(2)-C(31)    | 110.2(4)   | C(34)-P(2)-C(31)    | 107.1(5)   |
| N(2)-P(2)-Rh(2)    | 108.8(3)   | C(34)-P(2)-Rh(2)    | 111.5(3)   |
| C(31)-P(2)-Rh(2)   | 114.5(3)   | N(2)-P(2)-U(1)      | 44.7(3)    |
| C(34)-P(2)-U(1)    | 116.1(4)   | C(31)-P(2)-U(1)     | 133.8(4)   |
| Rh(2)-P(2)-U(1)    | 64.33(6)   | N(3)-P(3)-C(28)     | 110.8(4)   |
| N(3)-P(3)-C(25)    | 104.9(4)   | C(28)-P(3)-C(25)    | 107.0(5)   |
| N(3)-P(3)-Rh(2)    | 107.8(3)   | C(28)-P(3)-Rh(2)    | 114.0(4)   |
| C(25)-P(3)-Rh(2)   | 112.1(3)   | N(3)-P(3)-U(1)      | 45.6(2)    |
| C(28)-P(3)-U(1)    | 142.0(4)   | C(25)-P(3)-U(1)     | 108.1(3)   |
| Rh(2)-P(3)-U(1)    | 64.53(6)   | C(15)-Rh(1)-C(16)   | 39.2(4)    |
| C(15)-Rh(1)-C(11)  | 96.5(4)    | C(16)-Rh(1)-C(11)   | 81.4(4)    |
| C(15)-Rh(1)-C(12)  | 80.4(4)    | C(16)-Rh(1)-C(12)   | 88.5(4)    |
| C(11)-Rh(1)-C(12)  | 35.5(4)    | C(15)-Rh(1)-P(1)    | 91.4(3)    |
| C(16)-Rh(1)-P(1)   | 97.7(3)    | C(11)-Rh(1)-P(1)    | 165.8(3)   |
| C(12)-Rh(1)-P(1)   | 158.5(4)   | C(15)-Rh(1)-Cl(1)   | 146.8(3)   |
| C(16)-Rh(1)-Cl(1)  | 170.5(3)   | C(11)-Rh(1)-Cl(1)   | 89.7(3)    |
| C(12)-Rh(1)-Cl(1)  | 86.3(3)    | P(1)-Rh(1)-Cl(1)    | 89.98(10)  |
| P(3)-Rh(2)-P(2)    | 98.77(9)   | P(3)-Rh(2)-Cl(3)    | 91.27(9)   |
| P(2)-Rh(2)-Cl(3)   | 169.04(9)  | P(3)-Rh(2)-Cl(3)#1  | 166.60(9)  |
| P(2)-Rh(2)-Cl(3)#1 | 91.61(9)   | Cl(3)-Rh(2)-Cl(3)#1 | 77.83(9)   |
| P(3)-Rh(2)-U(1)    | 71.53(6)   | P(2)-Rh(2)-U(1)     | 71.68(6)   |
| Cl(3)-Rh(2)-U(1)   | 116.11(9)  | Cl(3)#1-Rh(2)-U(1)  | 120.20(8)  |
| N(2)-U(1)-N(3)     | 87.9(3)    | N(2)-U(1)-N(1)      | 103.8(3)   |
| N(3)-U(1)-N(1)     | 120.6(3)   | N(2)-U(1)-N(4)      | 67.3(2)    |
| N(3)-U(1)-N(4)     | 65.4(2)    | N(1)-U(1)-N(4)      | 66.6(3)    |
| N(2)-U(1)-Cl(2)    | 168.49(19) | N(3)-U(1)-Cl(2)     | 91.5(2)    |
| N(1)-U(1)-Cl(2)    | 86.3(2)    | N(4)-U(1)-Cl(2)     | 122.69(19) |
| N(2)-U(1)-Cl(1)    | 90.0(2)    | N(3)-U(1)-Cl(1)     | 156.84(18) |
| N(1)-U(1)-Cl(1)    | 82.2(2)    | N(4)-U(1)-Cl(1)     | 134.02(18) |
| Cl(2)-U(1)-Cl(1)   | 86.03(10)  | N(2)-U(1)-Rh(2)     | 74.69(17)  |
| N(3)-U(1)-Rh(2)    | 74.12(17)  | N(1)-U(1)-Rh(2)     | 165.2(2)   |
| N(4)-U(1)-Rh(2)    | 124.21(16) | Cl(2)-U(1)-Rh(2)    | 94.10(7)   |
| Cl(1)-U(1)-Rh(2)   | 83.08(6)   | N(2)-U(1)-P(3)      | 87.58(19)  |

|                 |           |                 |           |
|-----------------|-----------|-----------------|-----------|
| N(3)-U(1)-P(3)  | 31.43(17) | N(1)-U(1)-P(3)  | 150.6(2)  |
| N(4)-U(1)-P(3)  | 94.25(17) | Cl(2)-U(1)-P(3) | 85.99(8)  |
| Cl(1)-U(1)-P(3) | 125.44(7) | Rh(2)-U(1)-P(3) | 43.94(4)  |
| N(2)-U(1)-P(2)  | 30.83(17) | N(3)-U(1)-P(2)  | 82.52(19) |
| N(1)-U(1)-P(2)  | 132.3(2)  | N(4)-U(1)-P(2)  | 92.66(18) |
| Cl(2)-U(1)-P(2) | 137.76(8) | Cl(1)-U(1)-P(2) | 83.89(7)  |
| Rh(2)-U(1)-P(2) | 44.00(4)  | P(3)-U(1)-P(2)  | 67.48(6)  |

Symmetry transformations used to generate equivalent atoms: #1 -x,-y+2,-z+1

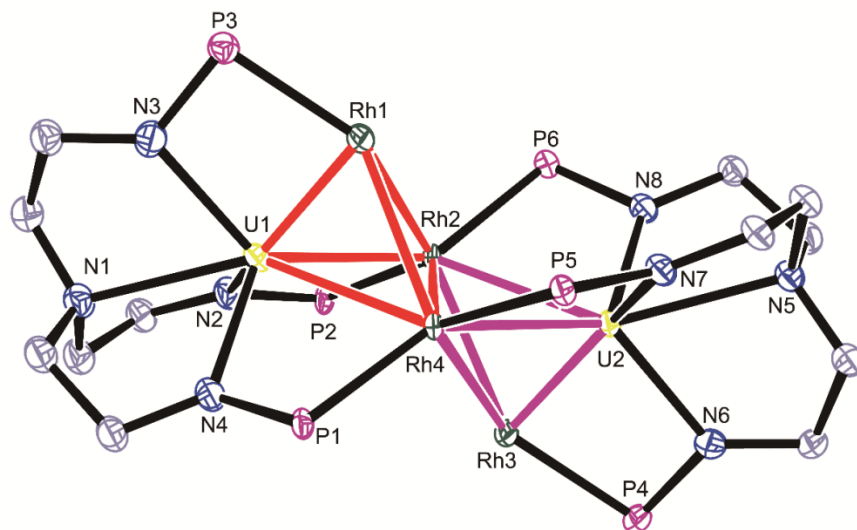

**Fig. S9.** Crystal structure of complex **3**. Thermal ellipsoids are drawn at 50% probability. Hydrogen atoms and isopropyl moieties in  $P^iPr_2$  are omitted for clarity.

**Table S3.** Bond lengths (Å) and angles [°] for complex **3**

|             |            |             |            |
|-------------|------------|-------------|------------|
| U(1)-N(4)   | 2.281(13)  | U(1)-N(4')  | 2.29(10)   |
| U(1)-N(2')  | 2.30(9)    | U(1)-N(2)   | 2.312(13)  |
| U(1)-Rh(1)  | 2.3164(9)  | U(1)-N(3)   | 2.320(9)   |
| U(1)-N(1)   | 2.655(9)   | U(1)-Rh(2') | 2.895(9)   |
| U(1)-Rh(4)  | 2.8976(10) | U(1)-Rh(2)  | 2.9740(10) |
| U(1)-Rh(4') | 3.038(9)   | U(1)-P(3)   | 3.101(3)   |
| U(2)-N(7)   | 2.263(10)  | U(2)-N(6)   | 2.301(10)  |
| U(2)-N(8)   | 2.311(10)  | U(2)-Rh(3)  | 2.3125(10) |
| U(2)-N(5)   | 2.645(9)   | U(2)-Rh(2)  | 2.9445(12) |
| U(2)-Rh(4)  | 2.9788(11) | U(2)-P(4)   | 3.082(3)   |
| U(2)-P(5)   | 3.131(3)   | U(2)-P(6)   | 3.227(3)   |
| Rh(2)-P(5)  | 2.318(3)   | Rh(2)-P(1)  | 2.359(4)   |
| Rh(2)-Rh(1) | 2.8815(14) | Rh(2)-Rh(4) | 2.9511(16) |
| Rh(2)-Rh(3) | 3.0317(15) | Rh(3)-P(4)  | 2.301(3)   |
| Rh(3)-Rh(4) | 2.8027(14) | Rh(4)-P(2)  | 2.324(3)   |
| Rh(4)-P(6)  | 2.342(3)   | Rh(4)-Rh(1) | 2.8858(14) |

|               |           |               |           |
|---------------|-----------|---------------|-----------|
| N(6)-C(8)     | 1.464(12) | N(6)-P(4)     | 1.663(10) |
| N(7)-C(10)    | 1.447(12) | N(7)-P(5)     | 1.693(10) |
| N(8)-C(12)    | 1.451(12) | N(8)-P(6)     | 1.656(10) |
| N(5)-C(7)     | 1.462(13) | N(5)-C(11)    | 1.467(12) |
| N(5)-C(9)     | 1.475(12) | P(4)-C(31)    | 1.849(11) |
| P(4)-C(34)    | 1.864(11) | P(5)-C(40)    | 1.860(10) |
| P(5)-C(37)    | 1.864(11) | P(6)-C(43)    | 1.860(10) |
| P(6)-C(46)    | 1.871(11) | C(7)-C(8)     | 1.546(13) |
| C(9)-C(10)    | 1.547(13) | C(11)-C(12)   | 1.540(13) |
| P(2)-N(2)     | 1.648(14) | P(2)-C(22)    | 1.867(11) |
| P(2)-C(19)    | 1.869(10) | P(1)-N(4)     | 1.699(13) |
| P(1)-C(16)    | 1.848(11) | P(1)-C(13)    | 1.869(11) |
| N(4)-C(2)     | 1.456(12) | C(1)-N(1)     | 1.471(13) |
| C(1)-C(2)     | 1.537(14) | N(2)-C(4)     | 1.455(12) |
| C(3)-N(1)     | 1.462(12) | C(3)-C(4)     | 1.539(14) |
| C(5)-N(1)     | 1.453(13) | C(5)-C(6)     | 1.548(13) |
| C(6)-N(3)     | 1.450(12) | C(13)-C(14)   | 1.518(14) |
| C(13)-C(15)   | 1.550(13) | C(16)-C(18)   | 1.530(13) |
| C(16)-C(17)   | 1.535(14) | C(19)-C(21)   | 1.534(13) |
| C(19)-C(20)   | 1.544(13) | C(22)-C(24)   | 1.530(13) |
| C(22)-C(23)   | 1.537(12) | C(31)-C(33)   | 1.525(13) |
| C(31)-C(32)   | 1.534(13) | C(34)-C(36)   | 1.527(13) |
| C(34)-C(35)   | 1.537(14) | C(37)-C(39)   | 1.539(12) |
| C(37)-C(38)   | 1.548(13) | C(40)-C(42)   | 1.526(13) |
| C(40)-C(41)   | 1.531(13) | C(43)-C(45)   | 1.530(13) |
| C(43)-C(44)   | 1.540(13) | C(46)-C(48)   | 1.541(13) |
| C(46)-C(47)   | 1.544(12) | U(2')-N(6')   | 2.29(7)   |
| U(2')-Rh(3')  | 2.328(7)  | U(2')-N(7')   | 2.36(7)   |
| U(2')-N(8')   | 2.40(7)   | U(2')-N(5')   | 2.68(2)   |
| U(2')-Rh(4')  | 2.954(11) | U(2')-Rh(2')  | 3.010(10) |
| U(2')-P(4')   | 3.04(2)   | U(2')-P(6')   | 3.07(2)   |
| U(2')-P(5')   | 3.18(2)   | Rh(2')-P(1')  | 2.36(3)   |
| Rh(2')-P(5')  | 2.39(2)   | Rh(2')-Rh(3') | 2.808(12) |
| Rh(2')-Rh(4') | 2.967(12) | Rh(2')-Rh(1)  | 3.009(9)  |
| Rh(3')-P(4')  | 2.32(2)   | Rh(3')-Rh(4') | 2.908(12) |
| Rh(4')-P(2')  | 2.37(3)   | Rh(4')-P(6')  | 2.38(2)   |
| Rh(4')-Rh(1)  | 2.820(9)  | P(5')-N(7')   | 1.59(7)   |
| P(5')-C(37')  | 1.85(2)   | P(5')-C(40')  | 1.85(2)   |
| N(5')-C(7')   | 1.45(2)   | N(5')-C(11')  | 1.45(2)   |
| N(5')-C(9')   | 1.45(2)   | C(9')-C(10')  | 1.55(2)   |
| C(10')-N(7')  | 1.45(2)   | C(7')-C(8')   | 1.55(2)   |
| C(8')-N(6')   | 1.45(2)   | N(6')-P(4')   | 1.68(7)   |
| P(4')-C(31')  | 1.85(2)   | P(4')-C(34')  | 1.86(2)   |

|                   |           |                   |            |
|-------------------|-----------|-------------------|------------|
| P(4')-C(32')      | 2.36(7)   | P(6')-N(8')       | 1.59(7)    |
| P(6')-C(46')      | 1.85(2)   | P(6')-C(43')      | 1.85(2)    |
| N(8')-C(12')      | 1.46(2)   | C(12')-C(11')     | 1.55(2)    |
| C(13')-C(14')     | 1.55(2)   | C(13')-C(15')     | 1.55(2)    |
| C(13')-P(1')      | 1.86(2)   | C(16')-C(18')     | 1.54(2)    |
| C(16')-C(17')     | 1.55(2)   | C(16')-P(1')      | 1.85(2)    |
| C(19')-C(21')     | 1.54(2)   | C(19')-C(20')     | 1.55(2)    |
| C(19')-P(2')      | 1.85(2)   | C(22')-C(23')     | 1.55(2)    |
| C(22')-C(24')     | 1.56(2)   | C(22')-P(2')      | 1.85(2)    |
| P(2')-N(2')       | 2.09(9)   | P(1')-N(4')       | 1.37(10)   |
| P(1')-C(2')       | 2.33(7)   | N(4')-C(2')       | 1.46(2)    |
| C(1')-N(1)        | 1.45(2)   | C(1')-C(2')       | 1.55(2)    |
| C(3')-N(1)        | 1.46(2)   | C(3')-C(4')       | 1.55(2)    |
| C(4')-N(2')       | 1.45(2)   | C(5')-N(1)        | 1.45(2)    |
| C(5')-C(6')       | 1.56(2)   | C(6')-N(3)        | 1.46(2)    |
| C(31')-C(33')     | 1.54(2)   | C(31')-C(32')     | 1.55(2)    |
| C(34')-C(36')     | 1.55(2)   | C(34')-C(35')     | 1.55(2)    |
| C(37')-C(38')     | 1.54(2)   | C(37')-C(39')     | 1.55(2)    |
| C(40')-C(42')     | 1.35(2)   | C(40')-C(41')     | 1.55(2)    |
| C(43')-C(45')     | 1.55(2)   | C(43')-C(44')     | 1.55(2)    |
| C(46')-C(48')     | 1.55(2)   | C(46')-C(47')     | 1.55(2)    |
| Rh(1)-P(3)        | 2.295(3)  | P(3)-N(3)         | 1.652(9)   |
| P(3)-C(25)        | 1.873(12) | P(3)-C(28)        | 1.892(12)  |
| C(25)-C(27)       | 1.486(17) | C(25)-C(26)       | 1.538(16)  |
| C(28)-C(30)       | 1.418(14) | C(28)-C(29)       | 1.527(17)  |
| C(49)-C(50)       | 1.34(2)   | C(49)-C(54)       | 1.41(2)    |
| C(50)-C(51)       | 1.41(2)   | C(51)-C(52)       | 1.41(2)    |
| C(52)-C(53)       | 1.37(2)   | C(52)-C(55)       | 1.53(2)    |
| C(53)-C(54)       | 1.37(2)   |                   |            |
|                   |           |                   |            |
| N(4')-U(1)-N(2')  | 114(3)    | N(4)-U(1)-N(2)    | 101.9(4)   |
| N(4)-U(1)-Rh(1)   | 129.3(3)  | N(4')-U(1)-Rh(1)  | 126(2)     |
| N(2')-U(1)-Rh(1)  | 119(2)    | N(2)-U(1)-Rh(1)   | 125.2(3)   |
| N(4)-U(1)-N(3)    | 106.3(4)  | N(4')-U(1)-N(3)   | 97(2)      |
| N(2')-U(1)-N(3)   | 100(2)    | N(2)-U(1)-N(3)    | 107.7(4)   |
| Rh(1)-U(1)-N(3)   | 78.6(2)   | N(4)-U(1)-N(1)    | 66.9(4)    |
| N(4')-U(1)-N(1)   | 63(2)     | N(2')-U(1)-N(1)   | 67(2)      |
| N(2)-U(1)-N(1)    | 66.9(4)   | Rh(1)-U(1)-N(1)   | 144.72(19) |
| N(3)-U(1)-N(1)    | 66.2(3)   | N(4')-U(1)-Rh(2') | 70(2)      |
| N(2')-U(1)-Rh(2') | 136(2)    | Rh(1)-U(1)-Rh(2') | 69.51(17)  |
| N(3)-U(1)-Rh(2')  | 123.5(3)  | N(1)-U(1)-Rh(2')  | 132.9(3)   |
| N(4)-U(1)-Rh(4)   | 118.5(3)  | N(2)-U(1)-Rh(4)   | 73.5(3)    |
| Rh(1)-U(1)-Rh(4)  | 66.12(3)  | N(3)-U(1)-Rh(4)   | 134.1(2)   |

|                    |            |                   |            |
|--------------------|------------|-------------------|------------|
| N(1)-U(1)-Rh(4)    | 140.02(19) | N(4)-U(1)-Rh(2)   | 75.2(3)    |
| N(2)-U(1)-Rh(2)    | 122.6(3)   | Rh(1)-U(1)-Rh(2)  | 64.61(3)   |
| N(3)-U(1)-Rh(2)    | 128.5(2)   | N(1)-U(1)-Rh(2)   | 142.10(19) |
| Rh(4)-U(1)-Rh(2)   | 60.33(3)   | N(4')-U(1)-Rh(4') | 120(2)     |
| N(2')-U(1)-Rh(4')  | 85(2)      | Rh(1)-U(1)-Rh(4') | 61.83(15)  |
| N(3)-U(1)-Rh(4')   | 136.6(3)   | N(1)-U(1)-Rh(4')  | 148.7(2)   |
| Rh(2')-U(1)-Rh(4') | 60.0(2)    | N(4)-U(1)-P(3)    | 126.3(3)   |
| N(4')-U(1)-P(3)    | 117(2)     | N(2')-U(1)-P(3)   | 109(2)     |
| N(2)-U(1)-P(3)     | 118.9(3)   | Rh(1)-U(1)-P(3)   | 47.45(5)   |
| N(3)-U(1)-P(3)     | 31.5(2)    | N(1)-U(1)-P(3)    | 97.3(2)    |
| Rh(2')-U(1)-P(3)   | 105.73(18) | Rh(4)-U(1)-P(3)   | 106.19(6)  |
| Rh(2)-U(1)-P(3)    | 105.85(5)  | Rh(4')-U(1)-P(3)  | 106.06(16) |
| N(7)-U(2)-N(6)     | 103.1(4)   | N(7)-U(2)-N(8)    | 106.0(3)   |
| N(6)-U(2)-N(8)     | 106.5(4)   | N(7)-U(2)-Rh(3)   | 136.0(2)   |
| N(6)-U(2)-Rh(3)    | 79.8(2)    | N(8)-U(2)-Rh(3)   | 115.3(2)   |
| N(7)-U(2)-N(5)     | 66.0(3)    | N(6)-U(2)-N(5)    | 65.7(3)    |
| N(8)-U(2)-N(5)     | 67.9(3)    | Rh(3)-U(2)-N(5)   | 143.9(2)   |
| N(7)-U(2)-Rh(2)    | 75.8(2)    | N(6)-U(2)-Rh(2)   | 128.5(3)   |
| N(8)-U(2)-Rh(2)    | 123.6(3)   | Rh(3)-U(2)-Rh(2)  | 69.24(3)   |
| N(5)-U(2)-Rh(2)    | 141.8(2)   | N(7)-U(2)-Rh(4)   | 119.8(2)   |
| N(6)-U(2)-Rh(4)    | 135.8(3)   | N(8)-U(2)-Rh(4)   | 73.1(2)    |
| Rh(3)-U(2)-Rh(4)   | 62.48(3)   | N(5)-U(2)-Rh(4)   | 140.2(2)   |
| Rh(2)-U(2)-Rh(4)   | 59.76(3)   | N(7)-U(2)-P(4)    | 125.6(3)   |
| N(6)-U(2)-P(4)     | 32.0(2)    | N(8)-U(2)-P(4)    | 114.2(3)   |
| Rh(3)-U(2)-P(4)    | 47.92(6)   | N(5)-U(2)-P(4)    | 96.8(2)    |
| Rh(2)-U(2)-P(4)    | 107.55(7)  | Rh(4)-U(2)-P(4)   | 106.14(6)  |
| N(7)-U(2)-P(5)     | 31.7(2)    | N(6)-U(2)-P(5)    | 115.2(3)   |
| N(8)-U(2)-P(5)     | 124.6(3)   | Rh(3)-U(2)-P(5)   | 106.88(6)  |
| N(5)-U(2)-P(5)     | 97.5(2)    | Rh(2)-U(2)-P(5)   | 44.73(6)   |
| Rh(4)-U(2)-P(5)    | 98.09(6)   | P(4)-U(2)-P(5)    | 120.63(9)  |
| N(7)-U(2)-P(6)     | 113.8(3)   | N(6)-U(2)-P(6)    | 127.6(3)   |
| N(8)-U(2)-P(6)     | 29.3(3)    | Rh(3)-U(2)-P(6)   | 96.50(6)   |
| N(5)-U(2)-P(6)     | 96.3(2)    | Rh(2)-U(2)-P(6)   | 96.84(6)   |
| Rh(4)-U(2)-P(6)    | 44.12(5)   | P(4)-U(2)-P(6)    | 119.33(8)  |
| P(5)-U(2)-P(6)     | 115.82(8)  | P(5)-Rh(2)-P(1)   | 118.09(12) |
| P(5)-Rh(2)-Rh(1)   | 102.13(8)  | P(1)-Rh(2)-Rh(1)  | 108.31(9)  |
| P(5)-Rh(2)-U(2)    | 71.90(8)   | P(1)-Rh(2)-U(2)   | 145.70(9)  |
| Rh(1)-Rh(2)-U(2)   | 100.48(4)  | P(5)-Rh(2)-Rh(4)  | 121.84(9)  |
| P(1)-Rh(2)-Rh(4)   | 120.07(9)  | Rh(1)-Rh(2)-Rh(4) | 59.30(3)   |
| U(2)-Rh(2)-Rh(4)   | 60.70(3)   | P(5)-Rh(2)-U(1)   | 146.41(9)  |
| P(1)-Rh(2)-U(1)    | 72.06(8)   | Rh(1)-Rh(2)-U(1)  | 46.57(2)   |
| U(2)-Rh(2)-U(1)    | 119.25(4)  | Rh(4)-Rh(2)-U(1)  | 58.55(3)   |
| P(5)-Rh(2)-Rh(3)   | 109.92(8)  | P(1)-Rh(2)-Rh(3)  | 103.76(9)  |

|                   |            |                   |           |
|-------------------|------------|-------------------|-----------|
| Rh(1)-Rh(2)-Rh(3) | 115.14(5)  | U(2)-Rh(2)-Rh(3)  | 45.50(3)  |
| Rh(4)-Rh(2)-Rh(3) | 55.85(3)   | U(1)-Rh(2)-Rh(3)  | 97.04(4)  |
| P(4)-Rh(3)-U(2)   | 83.84(8)   | P(4)-Rh(3)-Rh(4)  | 143.21(9) |
| U(2)-Rh(3)-Rh(4)  | 70.49(3)   | P(4)-Rh(3)-Rh(2)  | 131.03(9) |
| U(2)-Rh(3)-Rh(2)  | 65.26(3)   | Rh(4)-Rh(3)-Rh(2) | 60.62(4)  |
| P(2)-Rh(4)-P(6)   | 115.72(12) | P(2)-Rh(4)-Rh(3)  | 97.35(9)  |
| P(6)-Rh(4)-Rh(3)  | 108.24(8)  | P(2)-Rh(4)-Rh(1)  | 113.77(9) |
| P(6)-Rh(4)-Rh(1)  | 99.98(8)   | Rh(3)-Rh(4)-Rh(1) | 122.67(5) |
| P(2)-Rh(4)-U(1)   | 75.15(8)   | P(6)-Rh(4)-U(1)   | 143.59(9) |
| Rh(3)-Rh(4)-U(1)  | 104.24(4)  | Rh(1)-Rh(4)-U(1)  | 47.22(2)  |
| P(2)-Rh(4)-Rh(2)  | 123.07(9)  | P(6)-Rh(4)-Rh(2)  | 121.16(9) |
| Rh(3)-Rh(4)-Rh(2) | 63.53(4)   | Rh(1)-Rh(4)-Rh(2) | 59.15(3)  |
| U(1)-Rh(4)-Rh(2)  | 61.12(3)   | P(2)-Rh(4)-U(2)   | 141.91(9) |
| P(6)-Rh(4)-U(2)   | 73.58(8)   | Rh(3)-Rh(4)-U(2)  | 47.03(3)  |
| Rh(1)-Rh(4)-U(2)  | 99.58(4)   | U(1)-Rh(4)-U(2)   | 120.66(4) |
| Rh(2)-Rh(4)-U(2)  | 59.54(3)   | C(8)-N(6)-P(4)    | 128.2(8)  |
| C(8)-N(6)-U(2)    | 129.1(7)   | P(4)-N(6)-U(2)    | 100.8(5)  |
| C(10)-N(7)-P(5)   | 127.2(8)   | C(10)-N(7)-U(2)   | 128.9(7)  |
| P(5)-N(7)-U(2)    | 103.7(4)   | C(12)-N(8)-P(6)   | 125.4(8)  |
| C(12)-N(8)-U(2)   | 125.5(7)   | P(6)-N(8)-U(2)    | 107.7(5)  |
| C(7)-N(5)-C(11)   | 111.7(9)   | C(7)-N(5)-C(9)    | 111.3(9)  |
| C(11)-N(5)-C(9)   | 109.9(9)   | C(7)-N(5)-U(2)    | 109.2(7)  |
| C(11)-N(5)-U(2)   | 106.7(6)   | C(9)-N(5)-U(2)    | 107.8(7)  |
| N(6)-P(4)-C(31)   | 109.1(6)   | N(6)-P(4)-C(34)   | 106.0(5)  |
| C(31)-P(4)-C(34)  | 103.5(6)   | N(6)-P(4)-Rh(3)   | 95.3(4)   |
| C(31)-P(4)-Rh(3)  | 119.2(4)   | C(34)-P(4)-Rh(3)  | 122.3(4)  |
| N(6)-P(4)-U(2)    | 47.2(3)    | C(31)-P(4)-U(2)   | 130.1(4)  |
| C(34)-P(4)-U(2)   | 123.9(4)   | Rh(3)-P(4)-U(2)   | 48.25(6)  |
| N(7)-P(5)-C(40)   | 103.8(5)   | N(7)-P(5)-C(37)   | 106.0(5)  |
| C(40)-P(5)-C(37)  | 102.1(5)   | N(7)-P(5)-Rh(2)   | 106.9(4)  |
| C(40)-P(5)-Rh(2)  | 121.4(4)   | C(37)-P(5)-Rh(2)  | 115.2(4)  |
| N(7)-P(5)-U(2)    | 44.6(3)    | C(40)-P(5)-U(2)   | 135.1(4)  |
| C(37)-P(5)-U(2)   | 115.8(4)   | Rh(2)-P(5)-U(2)   | 63.38(8)  |
| N(8)-P(6)-C(43)   | 104.1(5)   | N(8)-P(6)-C(46)   | 108.6(5)  |
| C(43)-P(6)-C(46)  | 100.0(5)   | N(8)-P(6)-Rh(4)   | 104.8(4)  |
| C(43)-P(6)-Rh(4)  | 121.4(4)   | C(46)-P(6)-Rh(4)  | 116.9(4)  |
| N(8)-P(6)-U(2)    | 43.0(3)    | C(43)-P(6)-U(2)   | 120.5(4)  |
| C(46)-P(6)-U(2)   | 133.1(4)   | Rh(4)-P(6)-U(2)   | 62.30(7)  |
| N(5)-C(7)-C(8)    | 111.6(9)   | N(6)-C(8)-C(7)    | 106.1(9)  |
| N(5)-C(9)-C(10)   | 109.2(9)   | N(7)-C(10)-C(9)   | 107.5(9)  |
| (5)-C(11)-C(12)   | 112.7(9)   | N(8)-C(12)-C(11)  | 109.0(9)  |
| N(2)-P(2)-C(22)   | 110.7(6)   | N(2)-P(2)-C(19)   | 102.7(5)  |
| C(22)-P(2)-C(19)  | 98.8(5)    | N(2)-P(2)-Rh(4)   | 103.7(4)  |

|                     |           |                     |           |
|---------------------|-----------|---------------------|-----------|
| C(22)-P(2)-Rh(4)    | 117.7(4)  | C(19)-P(2)-Rh(4)    | 122.3(4)  |
| N(2)-P(2)-U(1)      | 43.3(4)   | C(22)-P(2)-U(1)     | 132.9(4)  |
| C(19)-P(2)-U(1)     | 122.3(4)  | Rh(4)-P(2)-U(1)     | 60.55(8)  |
| N(4)-P(1)-C(16)     | 108.4(6)  | N(4)-P(1)-C(13)     | 103.7(6)  |
| C(16)-P(1)-C(13)    | 100.5(5)  | N(4)-P(1)-Rh(2)     | 105.4(4)  |
| C(16)-P(1)-Rh(2)    | 114.8(4)  | C(13)-P(1)-Rh(2)    | 123.0(4)  |
| N(4)-P(1)-U(1)      | 43.9(4)   | C(16)-P(1)-U(1)     | 136.0(4)  |
| C(13)-P(1)-U(1)     | 117.4(4)  | Rh(2)-P(1)-U(1)     | 62.98(8)  |
| C(2)-N(4)-P(1)      | 125.6(11) | C(2)-N(4)-U(1)      | 126.9(9)  |
| P(1)-N(4)-U(1)      | 104.9(5)  | N(1)-C(1)-C(2)      | 110.8(10) |
| N(4)-C(2)-C(1)      | 109.4(10) | C(4)-N(2)-P(2)      | 125.9(10) |
| C(4)-N(2)-U(1)      | 126.3(10) | P(2)-N(2)-U(1)      | 107.4(5)  |
| N(1)-C(3)-C(4)      | 111.4(10) | N(2)-C(4)-C(3)      | 108.0(11) |
| N(1)-C(5)-C(6)      | 114.9(10) | N(3)-C(6)-C(5)      | 104.9(9)  |
| C(14)-C(13)-C(15)   | 110.5(10) | C(14)-C(13)-P(1)    | 111.4(9)  |
| C(15)-C(13)-P(1)    | 112.4(9)  | C(18)-C(16)-C(17)   | 108.1(10) |
| C(18)-C(16)-P(1)    | 118.0(9)  | C(17)-C(16)-P(1)    | 111.7(8)  |
| C(21)-C(19)-C(20)   | 109.3(9)  | C(21)-C(19)-P(2)    | 112.1(8)  |
| C(20)-C(19)-P(2)    | 113.1(8)  | C(24)-C(22)-C(23)   | 109.0(9)  |
| C(24)-C(22)-P(2)    | 108.1(8)  | C(23)-C(22)-P(2)    | 118.8(9)  |
| C(33)-C(31)-C(32)   | 109.7(10) | C(33)-C(31)-P(4)    | 117.8(9)  |
| C(32)-C(31)-P(4)    | 112.6(9)  | C(36)-C(34)-C(35)   | 108.5(10) |
| C(36)-C(34)-P(4)    | 113.2(9)  | C(35)-C(34)-P(4)    | 110.5(8)  |
| C(39)-C(37)-C(38)   | 109.9(9)  | C(39)-C(37)-P(5)    | 117.5(8)  |
| C(38)-C(37)-P(5)    | 107.8(8)  | C(42)-C(40)-C(41)   | 109.6(9)  |
| C(42)-C(40)-P(5)    | 111.5(8)  | C(41)-C(40)-P(5)    | 111.3(9)  |
| C(45)-C(43)-C(44)   | 108.9(9)  | C(45)-C(43)-P(6)    | 111.9(9)  |
| C(44)-C(43)-P(6)    | 112.0(8)  | C(48)-C(46)-C(47)   | 109.5(9)  |
| C(48)-C(46)-P(6)    | 108.6(8)  | C(47)-C(46)-P(6)    | 119.4(8)  |
| N(6')-U(2')-Rh(3')  | 82.1(16)  | N(6')-U(2')-N(7')   | 107(3)    |
| Rh(3')-U(2')-N(7')  | 119.1(15) | N(6')-U(2')-N(8')   | 100(3)    |
| Rh(3')-U(2')-N(8')  | 132.1(15) | N(7')-U(2')-N(8')   | 106(2)    |
| N(6')-U(2')-N(5')   | 65(2)     | Rh(3')-U(2')-N(5')  | 145.3(12) |
| N(7')-U(2')-N(5')   | 65.2(19)  | N(8')-U(2')-N(5')   | 67.4(19)  |
| N(6')-U(2')-Rh(4')  | 127.8(18) | Rh(3')-U(2')-Rh(4') | 65.6(3)   |
| N(7')-U(2')-Rh(4')  | 124.0(16) | N(8')-U(2')-Rh(4')  | 77.1(15)  |
| N(5')-U(2')-Rh(4')  | 144.3(12) | N(6')-U(2')-Rh(2')  | 136.5(18) |
| Rh(3')-U(2')-Rh(2') | 61.9(3)   | N(7')-U(2')-Rh(2')  | 74.2(15)  |
| N(8')-U(2')-Rh(2')  | 122.3(16) | N(5')-U(2')-Rh(2')  | 139.1(12) |
| Rh(4')-U(2')-Rh(2') | 59.7(2)   | N(6')-U(2')-P(4')   | 33.1(17)  |
| Rh(3')-U(2')-P(4')  | 49.1(5)   | N(7')-U(2')-P(4')   | 117.0(18) |
| N(8')-U(2')-P(4')   | 121.9(17) | N(5')-U(2')-P(4')   | 96.9(12)  |
| Rh(4')-U(2')-P(4')  | 105.5(5)  | Rh(2')-U(2')-P(4')  | 106.1(5)  |



|                     |           |                      |           |
|---------------------|-----------|----------------------|-----------|
| N(6')-U(2')-P(6')   | 113(2)    | Rh(3')-U(2')-P(6')   | 104.6(5)  |
| N(7')-U(2')-P(6')   | 123.3(18) | N(8')-U(2')-P(6')    | 30.9(15)  |
| N(5')-U(2')-P(6')   | 98.3(12)  | Rh(4')-U(2')-P(6')   | 46.4(5)   |
| Rh(2')-U(2')-P(6')  | 99.5(5)   | P(4')-U(2')-P(6')    | 118.7(6)  |
| N(6')-U(2')-P(5')   | 127(2)    | Rh(3')-U(2')-P(5')   | 98.1(4)   |
| N(7')-U(2')-P(5')   | 29.0(15)  | N(8')-U(2')-P(5')    | 116.7(17) |
| N(5')-U(2')-P(5')   | 93.9(12)  | Rh(4')-U(2')-P(5')   | 98.3(5)   |
| Rh(2')-U(2')-P(5')  | 45.3(4)   | P(4')-U(2')-P(5')    | 120.1(6)  |
| P(6')-U(2')-P(5')   | 117.5(6)  | P(1')-Rh(2')-P(5')   | 117.3(9)  |
| P(1')-Rh(2')-Rh(3') | 100.7(7)  | P(5')-Rh(2')-Rh(3')  | 107.5(7)  |
| P(1')-Rh(2')-U(1)   | 72.0(7)   | P(5')-Rh(2')-U(1)    | 146.2(6)  |
| Rh(3')-Rh(2')-U(1)  | 101.9(3)  | P(1')-Rh(2')-Rh(4')  | 123.0(7)  |
| P(5')-Rh(2')-Rh(4') | 119.7(6)  | Rh(3')-Rh(2')-Rh(4') | 60.4(3)   |
| U(1)-Rh(2')-Rh(4')  | 62.4(3)   | P(1')-Rh(2')-Rh(1)   | 111.1(8)  |
| P(5')-Rh(2')-Rh(1)  | 104.2(6)  | Rh(3')-Rh(2')-Rh(1)  | 116.7(3)  |
| U(1)-Rh(2')-Rh(1)   | 46.15(14) | Rh(4')-Rh(2')-Rh(1)  | 56.3(2)   |
| P(1')-Rh(2')-U(2')  | 144.8(7)  | P(5')-Rh(2')-U(2')   | 71.0(6)   |
| Rh(3')-Rh(2')-U(2') | 47.0(2)   | U(1)-Rh(2')-U(2')    | 121.6(3)  |
| Rh(4')-Rh(2')-U(2') | 59.2(3)   | Rh(1)-Rh(2')-U(2')   | 98.3(3)   |
| P(4')-Rh(3')-U(2')  | 81.6(6)   | P(4')-Rh(3')-Rh(2')  | 140.6(7)  |
| U(2')-Rh(3')-Rh(2') | 71.1(3)   | P(4')-Rh(3')-Rh(4')  | 131.2(7)  |
| U(2')-Rh(3')-Rh(4') | 67.6(3)   | Rh(2')-Rh(3')-Rh(4') | 62.5(3)   |
| P(2')-Rh(4')-P(6')  | 121.2(9)  | P(2')-Rh(4')-Rh(1)   | 104.0(7)  |
| P(6')-Rh(4')-Rh(1)  | 102.3(6)  | P(2')-Rh(4')-Rh(3')  | 102.6(7)  |
| P(6')-Rh(4')-Rh(3') | 108.2(7)  | Rh(1)-Rh(4')-Rh(3')  | 119.6(3)  |
| P(2')-Rh(4')-U(2')  | 146.5(7)  | P(6')-Rh(4')-U(2')   | 69.3(6)   |
| Rh(1)-Rh(4')-U(2')  | 104.1(3)  | Rh(3')-Rh(4')-U(2')  | 46.8(2)   |
| P(2')-Rh(4')-Rh(2') | 118.7(8)  | P(6')-Rh(4')-Rh(2')  | 120.1(7)  |
| Rh(1)-Rh(4')-Rh(2') | 62.6(2)   | Rh(3')-Rh(4')-Rh(2') | 57.1(3)   |
| U(2')-Rh(4')-Rh(2') | 61.1(3)   | P(2')-Rh(4')-U(1)    | 70.8(7)   |
| P(6')-Rh(4')-U(1)   | 147.9(6)  | Rh(1)-Rh(4')-U(1)    | 46.40(14) |
| Rh(3')-Rh(4')-U(1)  | 96.3(3)   | U(2')-Rh(4')-U(1)    | 118.7(3)  |
| Rh(2')-Rh(4')-U(1)  | 57.6(2)   | N(7')-P(5')-C(37')   | 110(4)    |
| N(7')-P(5')-C(40')  | 97(3)     | C(37')-P(5')-C(40')  | 100(3)    |
| N(7')-P(5')-Rh(2')  | 109(2)    | C(37')-P(5')-Rh(2')  | 118(2)    |
| C(40')-P(5')-Rh(2') | 120(2)    | N(7')-P(5')-U(2')    | 46(2)     |
| C(37')-P(5')-U(2')  | 136.5(18) | C(40')-P(5')-U(2')   | 116.5(18) |
| Rh(2')-P(5')-U(2')  | 63.7(5)   | C(7')-N(5')-C(11')   | 113(6)    |
| C(7')-N(5')-C(9')   | 112(6)    | C(11')-N(5')-C(9')   | 108(5)    |
| C(7')-N(5')-U(2')   | 104(4)    | C(11')-N(5')-U(2')   | 105(4)    |
| C(9')-N(5')-U(2')   | 115(4)    | N(5')-C(9')-C(10')   | 106(5)    |
| N(7')-C(10')-C(9')  | 116(6)    | C(10')-N(7')-P(5')   | 130(5)    |
| C(10')-N(7')-U(2')  | 124(5)    | P(5')-N(7')-U(2')    | 105(3)    |

|                      |           |                      |           |
|----------------------|-----------|----------------------|-----------|
| N(5')-C(7')-C(8')    | 116(6)    | N(6')-C(8')-C(7')    | 97(6)     |
| C(8')-N(6')-P(4')    | 124(5)    | C(8')-N(6')-U(2')    | 132(5)    |
| P(4')-N(6')-U(2')    | 99(3)     | N(6')-P(4')-C(31')   | 99(3)     |
| N(6')-P(4')-C(34')   | 113(4)    | C(31')-P(4')-C(34')  | 116(3)    |
| N(6')-P(4')-Rh(3')   | 97(2)     | C(31')-P(4')-Rh(3')  | 116.0(18) |
| C(34')-P(4')-Rh(3')  | 113(2)    | N(6')-P(4')-C(32')   | 139(3)    |
| C(31')-P(4')-C(32')  | 40.9(14)  | C(34')-P(4')-C(32')  | 86(3)     |
| Rh(3')-P(4')-C(32')  | 109.0(18) | N(6')-P(4')-U(2')    | 48(2)     |
| C(31')-P(4')-U(2')   | 113.5(19) | C(34')-P(4')-U(2')   | 130(3)    |
| Rh(3')-P(4')-U(2')   | 49.3(5)   | C(32')-P(4')-U(2')   | 142.0(14) |
| N(8')-P(6')-C(46')   | 103(4)    | N(8')-P(6')-C(43')   | 100(3)    |
| C(46')-P(6')-C(43')  | 103(3)    | N(8')-P(6')-Rh(4')   | 114(3)    |
| C(46')-P(6')-Rh(4')  | 112(2)    | C(43')-P(6')-Rh(4')  | 122(2)    |
| N(8')-P(6')-U(2')    | 51(2)     | C(46')-P(6')-U(2')   | 116(2)    |
| C(43')-P(6')-U(2')   | 135(2)    | Rh(4')-P(6')-U(2')   | 64.2(6)   |
| C(12')-N(8')-P(6')   | 138(6)    | C(12')-N(8')-U(2')   | 124(5)    |
| P(6')-N(8')-U(2')    | 98(3)     | N(8')-C(12')-C(11')  | 108(6)    |
| N(5')-C(11')-C(12')  | 114(6)    | C(14')-C(13')-C(15') | 107.4(19) |
| C(14')-C(13')-P(1')  | 116(5)    | C(15')-C(13')-P(1')  | 118(6)    |
| C(18')-C(16')-C(17') | 114(6)    | C(18')-C(16')-P(1')  | 108(4)    |
| C(17')-C(16')-P(1')  | 120(5)    | C(21')-C(19')-C(20') | 108.1(19) |
| C(21')-C(19')-P(2')  | 114(5)    | C(20')-C(19')-P(2')  | 113(5)    |
| C(23')-C(22')-C(24') | 106.9(17) | C(23')-C(22')-P(2')  | 118(6)    |
| C(24')-C(22')-P(2')  | 115(5)    | C(19')-P(2')-C(22')  | 93(3)     |
| C(19')-P(2')-N(2')   | 119(3)    | C(22')-P(2')-N(2')   | 92(3)     |
| C(19')-P(2')-Rh(4')  | 116(2)    | C(22')-P(2')-Rh(4')  | 124(3)    |
| N(2')-P(2')-Rh(4')   | 110(3)    | C(19')-P(2')-U(1)    | 137(2)    |
| C(22')-P(2')-U(1)    | 124(2)    | N(2')-P(2')-U(1)     | 46(3)     |
| Rh(4')-P(2')-U(1)    | 64.5(7)   | N(4')-P(1')-C(16')   | 98(4)     |
| N(4')-P(1')-C(13')   | 112(5)    | C(16')-P(1')-C(13')  | 102(3)    |
| N(4')-P(1')-C(2')    | 36(3)     | C(16')-P(1')-C(2')   | 65(3)     |
| C(13')-P(1')-C(2')   | 105(3)    | N(4')-P(1')-Rh(2')   | 104(4)    |
| C(16')-P(1')-Rh(2')  | 120(3)    | C(13')-P(1')-Rh(2')  | 119(2)    |
| C(2')-P(1')-Rh(2')   | 131(2)    | N(4')-P(1')-U(1)     | 42(4)     |
| C(16')-P(1')-U(1)    | 115.6(19) | C(13')-P(1')-U(1)    | 135(3)    |
| C(2')-P(1')-U(1)     | 72(2)     | Rh(2')-P(1')-U(1)    | 61.9(6)   |
| P(1')-N(4')-C(2')    | 111(7)    | P(1')-N(4')-U(1)     | 115(4)    |
| C(2')-N(4')-U(1)     | 121(7)    | N(1)-C(1')-C(2')     | 108(5)    |
| N(4')-C(2')-C(1')    | 115(7)    | N(4')-C(2')-P(1')    | 33(4)     |
| C(1')-C(2')-P(1')    | 147(5)    | N(1)-C(3')-C(4')     | 120(5)    |
| N(2')-C(4')-C(3')    | 104(7)    | C(4')-N(2')-P(2')    | 132(6)    |
| C(4')-N(2')-U(1)     | 131(7)    | P(2')-N(2')-U(1)     | 93(3)     |
| N(1)-C(5')-C(6')     | 95(5)     | N(3)-C(6')-C(5')     | 105(4)    |

|                      |           |                      |            |
|----------------------|-----------|----------------------|------------|
| C(33')-C(31')-C(32') | 107.9(19) | C(33')-C(31')-P(4')  | 118(2)     |
| C(32')-C(31')-P(4')  | 88(3)     | C(31')-C(32')-P(4')  | 51(2)      |
| C(36')-C(34')-C(35') | 107.1(19) | C(36')-C(34')-P(4')  | 139(5)     |
| C(35')-C(34')-P(4')  | 106(4)    | C(38')-C(37')-C(39') | 108.1(19)  |
| C(38')-C(37')-P(5')  | 110(4)    | C(39')-C(37')-P(5')  | 121(5)     |
| C(42')-C(40')-C(41') | 119(2)    | C(42')-C(40')-P(5')  | 105(4)     |
| C(41')-C(40')-P(5')  | 117(5)    | C(45')-C(43')-C(44') | 107.7(19)  |
| C(45')-C(43')-P(6')  | 109(5)    | C(44')-C(43')-P(6')  | 109(5)     |
| C(48')-C(46')-C(47') | 106.9(19) | C(48')-C(46')-P(6')  | 120(5)     |
| C(47')-C(46')-P(6')  | 118(4)    | P(3)-Rh(1)-U(1)      | 84.52(7)   |
| P(3)-Rh(1)-Rh(4')    | 146.9(2)  | U(1)-Rh(1)-Rh(4')    | 71.77(17)  |
| P(3)-Rh(1)-Rh(2)     | 138.66(8) | U(1)-Rh(1)-Rh(2)     | 68.82(3)   |
| P(3)-Rh(1)-Rh(4)     | 135.38(8) | U(1)-Rh(1)-Rh(4)     | 66.65(3)   |
| Rh(2)-Rh(1)-Rh(4)    | 61.55(4)  | P(3)-Rh(1)-Rh(2')    | 128.23(19) |
| U(1)-Rh(1)-Rh(2')    | 64.34(17) | Rh(4')-Rh(1)-Rh(2')  | 61.1(2)    |
| N(3)-P(3)-C(25)      | 107.8(5)  | N(3)-P(3)-C(28)      | 110.6(5)   |
| C(25)-P(3)-C(28)     | 100.6(5)  | N(3)-P(3)-Rh(1)      | 94.8(3)    |
| C(25)-P(3)-Rh(1)     | 120.7(4)  | C(28)-P(3)-Rh(1)     | 121.6(4)   |
| N(3)-P(3)-U(1)       | 47.2(3)   | C(25)-P(3)-U(1)      | 122.2(4)   |
| C(28)-P(3)-U(1)      | 135.2(4)  | Rh(1)-P(3)-U(1)      | 48.03(6)   |
| C(6)-N(3)-P(3)       | 128.5(8)  | C(6')-N(3)-P(3)      | 135(2)     |
| C(6)-N(3)-U(1)       | 129.4(7)  | C(6')-N(3)-U(1)      | 114(4)     |
| P(3)-N(3)-U(1)       | 101.3(4)  | C(5')-N(1)-C(1')     | 118(4)     |
| C(5')-N(1)-C(3')     | 110(4)    | C(1')-N(1)-C(3')     | 105(5)     |
| C(5)-N(1)-C(3)       | 114.0(9)  | C(5)-N(1)-C(1)       | 108.3(9)   |
| C(3)-N(1)-C(1)       | 111.8(9)  | C(5')-N(1)-U(1)      | 108(3)     |
| C(1')-N(1)-U(1)      | 110(3)    | C(5)-N(1)-U(1)       | 107.5(7)   |
| C(3')-N(1)-U(1)      | 106(3)    | C(3)-N(1)-U(1)       | 108.2(7)   |
| C(1)-N(1)-U(1)       | 106.8(6)  | C(27)-C(25)-C(26)    | 111.5(10)  |
| C(27)-C(25)-P(3)     | 111.5(9)  | C(26)-C(25)-P(3)     | 108.0(8)   |
| C(30)-C(28)-C(29)    | 111.2(11) | C(30)-C(28)-P(3)     | 111.8(9)   |
| C(29)-C(28)-P(3)     | 114.3(9)  | C(50)-C(49)-C(54)    | 124.1(17)  |
| C(49)-C(50)-C(51)    | 117.5(16) | C(50)-C(51)-C(52)    | 120.8(17)  |
| C(53)-C(52)-C(51)    | 117.8(16) | C(53)-C(52)-C(55)    | 121.6(15)  |
| C(51)-C(52)-C(55)    | 120.5(16) | C(54)-C(53)-C(52)    | 123.1(16)  |
| C(53)-C(54)-C(49)    | 116.7(17) |                      |            |

#### 4. Computational Methods

The Gaussian09 program suite was used for all quantum-chemical calculations (4). We used Becke's 3-parameter hybrid version (5), combined with the non-local correlation functional provided by Perdew/Wang (6), denoted as B3PW91. The relativistic energy-consistent small-core pseudopotential of the Stuttgart-Köln ECP library was used in combination with its adapted segmented basis set to represent a uranium atom (7-9). In specific cases, the *f*-in-core RECPs adapted to either a U(III) or U(IV) core configuration (either  $5f^3$  or  $5f^2$ ) were used in association with the adapted basis set. For phosphorus, chlorine and rhodium, the quasi-relativistic energy-adjusted *ab-initio* pseudopotentials were used, along with their corresponding energy-optimized valence basis sets (10, 11). For all the atoms, the 6-31G(d) basis set was used (12,13). In all computations no constraints were imposed on the geometry. A full geometry optimization was performed for each structure using Schlegel's analytical gradient method (14) and the attainment of the energy minimum was verified by calculating the vibrational frequencies that result in the absence of imaginary eigenvalues. All stationary points have been identified for the minimum (number of imaginary frequencies,  $N_{\text{imag}} = 0$ ). The NBO analysis (15) was carried out on the optimized structures using the module included in the Gaussian package. Finally, the Chemcraft graphical program was used for the 3D representations of the structures and the orbital plots (16). Complete Active Space Calculations (CASSCF) were carried out using the Gaussian package.

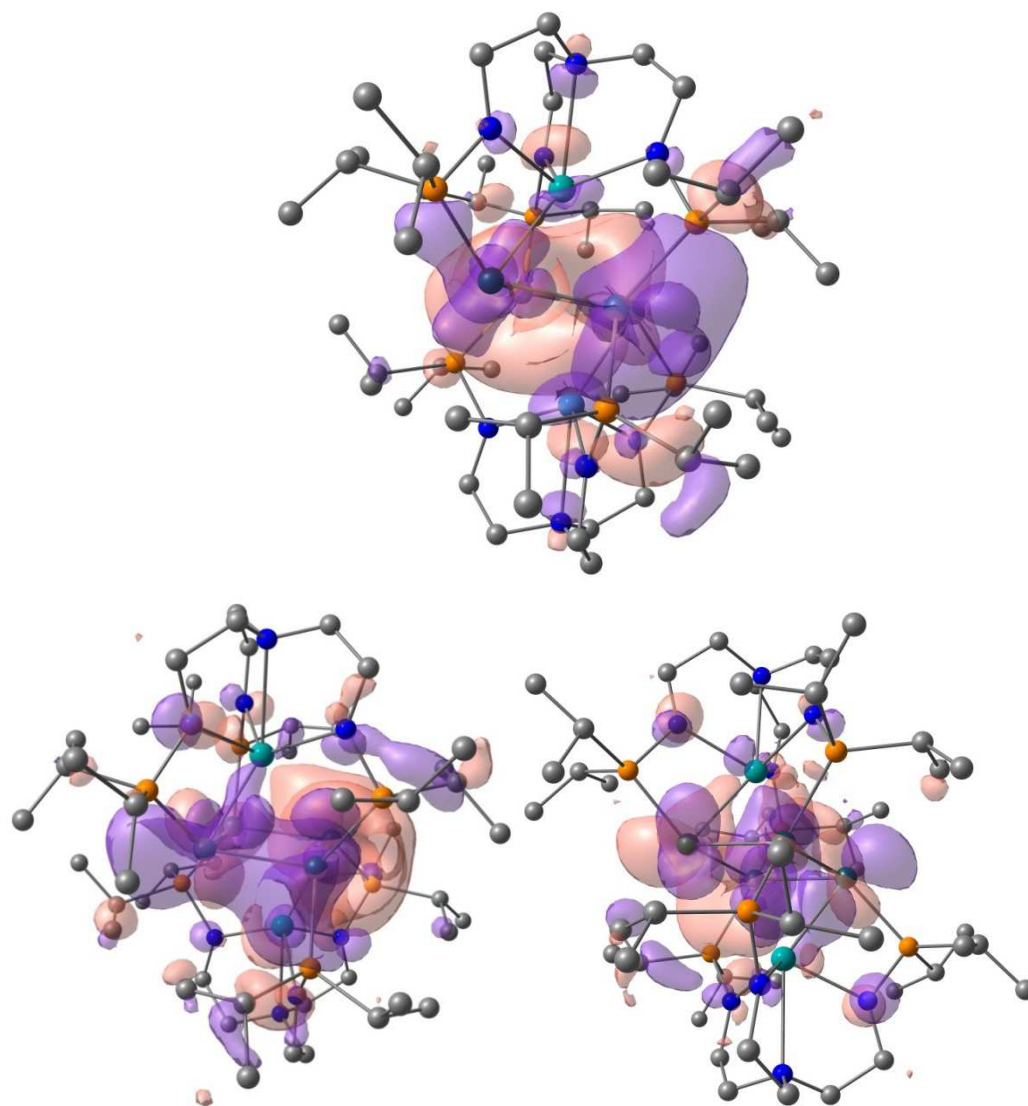

**Fig. S10.** Bonding U-Rh molecular orbitals of complex **3**. The first one is a  $\sigma$  orbital while the two others are  $\pi$ -type orbitals.

Optimized structure of complex **3**

176

|    |           |           |          |
|----|-----------|-----------|----------|
| U  | 2.136664  | 10.758474 | 7.203112 |
| U  | 3.837883  | 10.239925 | 2.413351 |
| Rh | 5.368247  | 10.342523 | 4.142722 |
| Rh | 3.016495  | 11.913622 | 4.626383 |
| Rh | 2.975633  | 8.988277  | 4.972942 |
| Rh | 0.607272  | 10.813229 | 5.477168 |
| P  | 2.213000  | 12.970508 | 2.727540 |
| P  | 2.272142  | 7.600691  | 3.202060 |
| P  | 3.814912  | 13.341869 | 6.296344 |
| P  | -0.932948 | 10.871102 | 7.184451 |
| P  | 3.639279  | 8.031686  | 6.981085 |
| P  | 6.924154  | 10.185305 | 2.459813 |

|   |           |           |           |
|---|-----------|-----------|-----------|
| N | 2.552472  | 8.491142  | 1.793733  |
| N | 3.188602  | 12.714351 | 7.673824  |
| N | 2.458769  | 11.108285 | 9.802691  |
| N | 3.536750  | 10.036219 | -0.201843 |
| N | 2.802459  | 12.050239 | 1.470023  |
| N | 3.365087  | 9.152543  | 8.195568  |
| N | 0.179048  | 10.655604 | 8.420260  |
| N | 5.863613  | 9.996914  | 1.287222  |
| C | 5.644472  | 13.470625 | 6.649378  |
| H | 5.759444  | 14.080523 | 7.407239  |
| C | 1.296817  | 10.472635 | 10.522469 |
| H | 1.280045  | 10.776229 | 11.444090 |
| H | 1.403105  | 9.508995  | 10.522469 |
| C | 6.219206  | 12.074635 | 7.072105  |
| H | 7.159707  | 12.155955 | 7.247289  |
| H | 6.077008  | 11.443051 | 6.363752  |
| H | 5.771397  | 11.772396 | 7.868050  |
| C | 6.353203  | 8.609056  | 7.110188  |
| H | 7.251939  | 8.302752  | 7.243480  |
| H | 6.136084  | 9.266391  | 7.776649  |
| H | 6.275827  | 9.002102  | 6.238076  |
| C | 0.392637  | 13.107396 | 2.361177  |
| H | 0.305141  | 13.539747 | 1.485256  |
| C | 2.653394  | 6.494741  | 7.487215  |
| H | 2.720037  | 5.836051  | 6.763628  |
| C | -1.908112 | 12.414823 | 7.609082  |
| H | -2.366846 | 12.272513 | 8.462152  |
| C | 3.373313  | 15.175630 | 6.158101  |
| H | 3.613715  | 15.442630 | 5.244097  |
| C | 3.720742  | 10.449594 | 10.202568 |
| H | 3.766351  | 10.385894 | 11.169888 |
| H | 4.476659  | 10.976818 | 9.897900  |
| C | 7.966415  | 11.651772 | 2.007000  |
| H | 8.473096  | 11.420011 | 1.199630  |
| C | -0.027874 | 10.848061 | 9.829349  |
| H | -0.748185 | 10.281533 | 10.145442 |
| H | -0.255988 | 11.772396 | 10.012150 |
| C | 2.248900  | 8.080477  | 0.437960  |
| H | 2.194013  | 7.112772  | 0.396068  |
| H | 1.387961  | 8.442351  | 0.175184  |
| C | 5.406253  | 7.450249  | 7.224439  |
| H | 5.474219  | 7.110061  | 8.138442  |
| C | 4.208917  | 14.827310 | 2.330710  |
| H | 4.485534  | 15.732671 | 2.201226  |

|   |           |           |           |
|---|-----------|-----------|-----------|
| H | 4.490785  | 14.293310 | 1.580465  |
| H | 4.606720  | 14.478990 | 3.134271  |
| C | 3.414577  | 13.241574 | 9.018171  |
| H | 3.235361  | 14.194371 | 9.025788  |
| H | 4.342639  | 13.106041 | 9.265714  |
| C | 3.783351  | 9.046828  | 9.585615  |
| H | 4.687787  | 8.699863  | 9.635124  |
| H | 3.196361  | 8.443706  | 10.065467 |
| C | 2.690782  | 14.764965 | 2.448769  |
| H | 2.449720  | 15.252884 | 3.263755  |
| C | -0.253046 | 11.701919 | 2.243118  |
| H | -1.182823 | 11.794082 | 2.026042  |
| H | -0.164012 | 11.238396 | 3.077146  |
| H | 0.189796  | 11.204513 | 1.549998  |
| C | 2.505436  | 12.538158 | 10.019767 |
| H | 2.824233  | 12.714351 | 10.918537 |
| H | 1.608898  | 12.900031 | 9.943600  |
| C | 8.246637  | 8.855726  | 2.448769  |
| H | 8.815807  | 9.050894  | 3.218055  |
| C | 0.468451  | 7.114127  | 3.301839  |
| H | 0.329669  | 6.741411  | 4.196801  |
| C | 3.103608  | 5.978361  | 2.810562  |
| H | 2.672244  | 5.602934  | 2.014617  |
| C | 4.059124  | 16.183996 | 7.087338  |
| H | 3.738183  | 17.067671 | 6.896921  |
| H | 5.011347  | 16.152823 | 6.946429  |
| H | 3.864649  | 15.964432 | 8.001342  |
| C | -0.366334 | 13.943635 | 3.343731  |
| H | -1.287255 | 13.996493 | 3.077146  |
| H | 0.008553  | 14.825955 | 3.374197  |
| H | -0.308640 | 13.543813 | 4.215843  |
| C | 4.540935  | 6.165396  | 2.502085  |
| H | 4.934411  | 5.315604  | 2.292626  |
| H | 4.982266  | 6.544889  | 3.263755  |
| H | 4.631222  | 6.754965  | 1.751841  |
| C | 7.048569  | 12.832264 | 1.656632  |
| H | 7.582498  | 13.585828 | 1.393856  |
| H | 6.522052  | 13.066737 | 2.425918  |
| H | 6.468297  | 12.584239 | 0.933046  |
| C | 2.053009  | 15.532082 | 1.260564  |
| H | 2.377323  | 16.430666 | 1.245330  |
| H | 1.097075  | 15.533437 | 1.359581  |
| H | 2.284329  | 15.090244 | 0.437960  |
| C | 6.032176  | 9.799036  | -0.198034 |

|   |           |           |           |
|---|-----------|-----------|-----------|
| H | 6.086549  | 8.854371  | -0.415110 |
| H | 6.831597  | 10.243584 | -0.517936 |
| C | 5.775251  | 6.330746  | 6.310435  |
| H | 6.682391  | 6.066457  | 6.478002  |
| H | 5.687224  | 6.618076  | 5.400239  |
| H | 5.191555  | 5.583960  | 6.466577  |
| C | 3.116169  | 5.830630  | 8.785862  |
| H | 2.562629  | 5.067579  | 8.968663  |
| H | 3.042965  | 6.458147  | 9.509448  |
| H | 4.029356  | 5.551432  | 8.694461  |
| C | 2.519577  | 12.233209 | 0.038083  |
| H | 3.230042  | 12.744168 | -0.377027 |
| H | 1.685871  | 12.715706 | -0.076167 |
| C | 6.413909  | 14.031731 | 5.495448  |
| H | 7.343106  | 14.095432 | 5.731566  |
| H | 6.078179  | 14.905919 | 5.282180  |
| H | 6.313750  | 13.455716 | 4.733778  |
| C | -2.186056 | 9.487310  | 7.342497  |
| H | -1.645551 | 8.682244  | 7.475790  |
| C | 0.019642  | 6.031219  | 2.311668  |
| H | -0.911384 | 5.850960  | 2.437344  |
| H | 0.531456  | 5.235640  | 2.456385  |
| H | 0.166676  | 6.347010  | 1.412898  |
| C | -2.966264 | 12.712995 | 6.531319  |
| H | -3.437739 | 13.523483 | 6.759820  |
| H | -3.586886 | 11.987894 | 6.478002  |
| H | -2.533775 | 12.833620 | 5.678249  |
| C | -0.993831 | 13.580407 | 7.757607  |
| H | -1.503915 | 14.366498 | 7.978492  |
| H | -0.524624 | 13.730848 | 6.931196  |
| H | -0.360113 | 13.405569 | 8.458344  |
| C | 2.421744  | 10.856193 | -0.601719 |
| H | 1.590500  | 10.438752 | -0.331326 |
| H | 2.412498  | 10.955132 | -1.565232 |
| C | 1.185702  | 6.952843  | 7.586232  |
| H | 0.629867  | 6.210122  | 7.818541  |
| H | 0.903976  | 7.312005  | 6.736970  |
| H | 1.108231  | 7.637285  | 8.260310  |
| C | 8.931804  | 12.008224 | 3.054296  |
| H | 9.458263  | 12.756366 | 2.761053  |
| H | 9.507891  | 11.260082 | 3.225672  |
| H | 8.461309  | 12.244051 | 3.854049  |
| C | -0.427684 | 8.308173  | 3.195205  |
| H | -1.343850 | 8.030330  | 3.263755  |



|   |           |           |           |
|---|-----------|-----------|-----------|
| H | -0.288572 | 8.740523  | 2.349751  |
| H | -0.226437 | 8.924848  | 3.903558  |
| C | 1.855202  | 15.305742 | 6.249501  |
| H | 1.609692  | 16.231432 | 6.184759  |
| H | 1.552822  | 14.949290 | 7.087338  |
| H | 1.449453  | 14.817823 | 5.525915  |
| C | 3.289566  | 8.552132  | -0.487469 |
| H | 2.998905  | 8.435574  | -1.405281 |
| H | 4.106946  | 8.050660  | -0.354176 |
| C | 4.771331  | 10.436041 | -0.807370 |
| H | 4.850192  | 11.395615 | -0.742628 |
| H | 4.738820  | 10.202924 | -1.748032 |
| C | 9.164754  | 8.835396  | 1.264372  |
| H | 9.784217  | 8.110295  | 1.355772  |
| H | 9.640753  | 9.664858  | 1.214863  |
| H | 8.647541  | 8.716127  | 0.460810  |
| C | 2.909068  | 4.951020  | 4.002575  |
| H | 3.322428  | 4.116137  | 3.777882  |
| H | 1.967898  | 4.811421  | 4.151101  |
| H | 3.307628  | 5.306117  | 4.798520  |
| C | -3.124742 | 9.500863  | 8.469769  |
| H | -3.714982 | 8.743234  | 8.401218  |
| H | -3.648285 | 10.308640 | 8.443110  |
| H | -2.643916 | 9.458848  | 9.296181  |
| C | 7.669026  | 7.576295  | 2.715353  |
| H | 8.366183  | 6.909472  | 2.711545  |
| H | 7.023475  | 7.366219  | 2.041275  |
| H | 7.247589  | 7.588493  | 3.576040  |
| C | -2.912607 | 9.243351  | 6.070509  |
| H | -3.539203 | 8.530447  | 6.196184  |
| H | -2.284190 | 9.007523  | 5.385006  |
| H | -3.380643 | 10.042995 | 5.815349  |

Optimized structure of complex **3** assuming  $5f^2$  configuration ( $U^{IV}$ )

176

|    |          |           |          |
|----|----------|-----------|----------|
| U  | 2.139555 | 10.757243 | 7.210396 |
| U  | 3.830038 | 10.237180 | 2.401299 |
| Rh | 5.377346 | 10.341345 | 4.166730 |
| Rh | 3.013021 | 11.918396 | 4.623243 |
| Rh | 2.977658 | 8.976900  | 4.974237 |
| Rh | 0.589688 | 10.808271 | 5.448185 |
| P  | 2.194534 | 12.980999 | 2.726612 |
| P  | 2.260366 | 7.579359  | 3.202557 |

|   |           |           |           |
|---|-----------|-----------|-----------|
| P | 3.826493  | 13.356584 | 6.288869  |
| P | -0.953251 | 10.873359 | 7.167382  |
| P | 3.653137  | 8.013273  | 6.982098  |
| P | 6.946134  | 10.189172 | 2.480651  |
| N | 2.535126  | 8.473767  | 1.784081  |
| N | 3.195614  | 12.725954 | 7.686217  |
| N | 2.463025  | 11.109215 | 9.815143  |
| N | 3.526773  | 10.033612 | -0.219849 |
| N | 2.786575  | 12.057416 | 1.454543  |
| N | 3.377746  | 9.139857  | 8.208803  |
| N | 0.171898  | 10.657014 | 8.423428  |
| N | 5.862904  | 9.995818  | 1.271137  |
| C | 5.664859  | 13.490078 | 6.632801  |
| H | 5.785838  | 14.134017 | 7.426145  |
| C | 1.301638  | 10.478941 | 10.533170 |
| H | 1.287209  | 10.801674 | 11.506983 |
| H | 1.413534  | 9.462768  | 10.531927 |
| C | 6.245043  | 12.105286 | 7.056430  |
| H | 7.243954  | 12.199161 | 7.235347  |
| H | 6.093376  | 11.431130 | 6.307468  |
| H | 5.778131  | 11.784005 | 7.903326  |
| C | 6.383981  | 8.594143  | 7.108483  |
| H | 7.337933  | 8.264692  | 7.247792  |
| H | 6.160215  | 9.292108  | 7.815766  |
| H | 6.304534  | 9.016646  | 6.183641  |
| C | 0.363352  | 13.115480 | 2.372346  |
| H | 0.265671  | 13.571310 | 1.454627  |
| C | 2.664201  | 6.468170  | 7.478653  |
| H | 2.736973  | 5.784536  | 6.713513  |
| C | -1.928133 | 12.424940 | 7.593545  |
| H | -2.409204 | 12.275606 | 8.490540  |
| C | 3.384295  | 15.194374 | 6.143312  |
| H | 3.633894  | 15.467539 | 5.182184  |
| C | 3.725977  | 10.447326 | 10.215889 |
| H | 3.773221  | 10.381710 | 11.238761 |
| H | 4.521431  | 11.003830 | 9.892266  |
| C | 7.996632  | 11.666491 | 2.034120  |
| H | 8.531291  | 11.424542 | 1.187969  |
| C | -0.027729 | 10.853090 | 9.842335  |
| H | -0.785011 | 10.254600 | 10.185138 |
| H | -0.265601 | 11.830493 | 10.039470 |
| C | 2.226524  | 8.061936  | 0.424518  |
| H | 2.173179  | 7.039663  | 0.372130  |
| H | 1.315087  | 8.439760  | 0.147070  |

|   |           |           |           |
|---|-----------|-----------|-----------|
| C | 5.425724  | 7.428824  | 7.221245  |
| H | 5.495341  | 7.068050  | 8.181540  |
| C | 4.198005  | 14.852227 | 2.328555  |
| H | 4.487667  | 15.817705 | 2.192715  |
| H | 4.497528  | 14.291361 | 1.531186  |
| H | 4.627634  | 14.482265 | 3.175399  |
| C | 3.423795  | 13.257137 | 9.031888  |
| H | 3.231718  | 14.262562 | 9.044192  |
| H | 4.404274  | 13.115639 | 9.295701  |
| C | 3.794506  | 9.039348  | 9.603037  |
| H | 4.751348  | 8.677952  | 9.661620  |
| H | 3.175592  | 8.404128  | 10.114457 |
| C | 2.674213  | 14.782883 | 2.454115  |
| H | 2.423540  | 15.290209 | 3.313437  |
| C | -0.279829 | 11.712002 | 2.255289  |
| H | -1.269185 | 11.810979 | 2.033125  |
| H | -0.177541 | 11.217714 | 3.140408  |
| H | 0.182658  | 11.184232 | 1.516809  |
| C | 2.510989  | 12.550174 | 10.034761 |
| H | 2.847687  | 12.738923 | 10.985427 |
| H | 1.564749  | 12.930481 | 9.952521  |
| C | 8.273527  | 8.852978  | 2.473719  |
| H | 8.867690  | 9.060423  | 3.286998  |
| C | 0.451260  | 7.088384  | 3.306026  |
| H | 0.309948  | 6.698941  | 4.247847  |
| C | 3.092690  | 5.947233  | 2.815330  |
| H | 2.635146  | 5.551092  | 1.983227  |
| C | 4.083009  | 16.201679 | 7.071735  |
| H | 3.744883  | 17.140383 | 6.867160  |
| H | 5.091083  | 16.166537 | 6.921405  |
| H | 3.881748  | 15.975877 | 8.044184  |
| C | -0.393440 | 13.956111 | 3.374533  |
| H | -1.373504 | 14.012717 | 3.100876  |
| H | 0.000152  | 14.894817 | 3.410778  |
| H | -0.324951 | 13.529536 | 4.298132  |
| C | 4.545924  | 6.135364  | 2.499790  |
| H | 4.964089  | 5.232627  | 2.279265  |
| H | 5.020153  | 6.541085  | 3.303450  |
| H | 4.644867  | 6.758409  | 1.701377  |
| C | 7.083422  | 12.852319 | 1.682356  |
| H | 7.654909  | 13.651343 | 1.409789  |
| H | 6.521286  | 13.099664 | 2.495299  |
| H | 6.469905  | 12.596964 | 0.910950  |
| C | 2.024832  | 15.545535 | 1.270275  |

|   |           |           |           |
|---|-----------|-----------|-----------|
| H | 2.367472  | 16.502544 | 1.255771  |
| H | 1.011513  | 15.545694 | 1.376609  |
| H | 2.266461  | 15.081711 | 0.395024  |
| C | 6.030698  | 9.801810  | -0.205692 |
| H | 6.088863  | 8.804743  | -0.433226 |
| H | 6.874694  | 10.273591 | -0.541724 |
| C | 5.793842  | 6.301234  | 6.291149  |
| H | 6.756700  | 6.017232  | 6.465708  |
| H | 5.700850  | 6.609648  | 5.325602  |
| H | 5.175985  | 5.506233  | 6.449499  |
| C | 3.131129  | 5.795835  | 8.776747  |
| H | 2.545761  | 4.982790  | 8.963509  |
| H | 3.051371  | 6.452495  | 9.550721  |
| H | 4.101159  | 5.501350  | 8.682821  |
| C | 2.500517  | 12.242309 | 0.022941  |
| H | 3.250329  | 12.783848 | -0.416100 |
| H | 1.618669  | 12.748725 | -0.099655 |
| C | 6.432162  | 14.052612 | 5.460068  |
| H | 7.419688  | 14.124788 | 5.702663  |
| H | 6.075930  | 14.978391 | 5.226083  |
| H | 6.323555  | 13.436776 | 4.655652  |
| C | -2.213590 | 9.487140  | 7.327389  |
| H | -1.643468 | 8.642297  | 7.468888  |
| C | 0.001691  | 5.999058  | 2.314186  |
| H | -0.987922 | 5.807655  | 2.451126  |
| H | 0.542943  | 5.151498  | 2.464513  |
| H | 0.152976  | 6.328425  | 1.360150  |
| C | -2.989932 | 12.726772 | 6.517014  |
| H | -3.484837 | 13.586368 | 6.761482  |
| H | -3.655144 | 11.960875 | 6.458293  |
| H | -2.533864 | 12.853260 | 5.612615  |
| C | -0.997895 | 13.598341 | 7.741638  |
| H | -1.534431 | 14.434149 | 7.976893  |
| H | -0.500604 | 13.756868 | 6.865742  |
| H | -0.322619 | 13.414648 | 8.482185  |
| C | 2.403043  | 10.860605 | -0.622892 |
| H | 1.527159  | 10.418677 | -0.336367 |
| H | 2.391803  | 10.966967 | -1.643151 |
| C | 1.191963  | 6.915303  | 7.583343  |
| H | 0.607380  | 6.118092  | 7.824858  |
| H | 0.887943  | 7.301207  | 6.688600  |
| H | 1.103459  | 7.633352  | 8.302617  |
| C | 8.971335  | 12.022722 | 3.107312  |
| H | 9.534805  | 12.817077 | 2.805463  |

|   |           |           |           |
|---|-----------|-----------|-----------|
| H | 9.583756  | 11.230652 | 3.295295  |
| H | 8.469222  | 12.271458 | 3.956989  |
| C | -0.451139 | 8.293684  | 3.196470  |
| H | -1.423535 | 7.999153  | 3.271841  |
| H | -0.307244 | 8.752703  | 2.298689  |
| H | -0.237912 | 8.952323  | 3.945511  |
| C | 1.861336  | 15.333981 | 6.242287  |
| H | 1.606379  | 16.318129 | 6.170956  |
| H | 1.539528  | 14.961996 | 7.133761  |
| H | 1.421887  | 14.817103 | 5.481759  |
| C | 3.280076  | 8.556741  | -0.505237 |
| H | 2.975369  | 8.439215  | -1.477326 |
| H | 4.146666  | 8.034292  | -0.364103 |
| C | 4.776051  | 10.440735 | -0.831408 |
| H | 4.862022  | 11.455600 | -0.761926 |
| H | 4.748070  | 10.195836 | -1.828190 |
| C | 9.203408  | 8.837551  | 1.277888  |
| H | 9.862853  | 8.067914  | 1.374839  |
| H | 9.711179  | 9.717210  | 1.223345  |
| H | 8.662381  | 8.711350  | 0.421754  |
| C | 2.902609  | 4.929038  | 4.003331  |
| H | 3.341644  | 4.042201  | 3.763562  |
| H | 1.907242  | 4.779352  | 4.167672  |
| H | 3.329950  | 5.309209  | 4.844442  |
| C | -3.163610 | 9.516072  | 8.480583  |
| H | -3.793741 | 8.715955  | 8.418769  |
| H | -3.718705 | 10.372329 | 8.454869  |
| H | -2.652985 | 9.475633  | 9.359461  |
| C | 7.680382  | 7.536093  | 2.740192  |
| H | 8.416515  | 6.827447  | 2.738510  |
| H | 6.996344  | 7.307695  | 2.022531  |
| H | 7.226344  | 7.540804  | 3.650925  |
| C | -2.951566 | 9.237522  | 6.036844  |
| H | -3.619183 | 8.481034  | 6.171602  |
| H | -2.288135 | 8.983496  | 5.307821  |
| H | -3.449942 | 10.080650 | 5.755934  |

Optimized structure of complex **3** assuming  $5f^{\beta}$  configuration ( $U^{\text{III}}$ )

|    |             |              |             |
|----|-------------|--------------|-------------|
| 92 | 2.716356000 | 10.872551000 | 6.901555000 |
| 92 | 3.320706000 | 10.177106000 | 2.680021000 |
| 45 | 5.387546000 | 9.339970000  | 4.837057000 |
| 45 | 2.577922000 | 13.164159000 | 4.594707000 |
| 45 | 3.387827000 | 7.914457000  | 4.997533000 |
| 45 | 0.613055000 | 11.681566000 | 4.769858000 |

|    |              |              |              |
|----|--------------|--------------|--------------|
| 15 | 1.496153000  | 13.122764000 | 2.439571000  |
| 15 | 2.178657000  | 7.063774000  | 3.164366000  |
| 15 | 3.616071000  | 14.072528000 | 6.518943000  |
| 15 | -0.575225000 | 11.132580000 | 6.660856000  |
| 15 | 4.622918000  | 7.980285000  | 7.094647000  |
| 15 | 6.607114000  | 9.751658000  | 2.922427000  |
| 7  | 2.556993000  | 8.024415000  | 1.817977000  |
| 7  | 3.101539000  | 13.134405000 | 7.838975000  |
| 7  | 2.678556000  | 11.067242000 | 9.704028000  |
| 7  | 3.352615000  | 9.900122000  | -0.118342000 |
| 7  | 2.087758000  | 11.918511000 | 1.394378000  |
| 7  | 4.116327000  | 9.215188000  | 8.149601000  |
| 7  | 0.504284000  | 10.601892000 | 7.886007000  |
| 7  | 5.521322000  | 10.082722000 | 1.653177000  |
| 6  | 5.522653000  | 14.188595000 | 6.659805000  |
| 1  | 5.695209000  | 14.669411000 | 7.631803000  |
| 6  | 1.471912000  | 10.326491000 | 10.105887000 |
| 1  | 1.272963000  | 10.448650000 | 11.186588000 |
| 1  | 1.665723000  | 9.264306000  | 9.928382000  |
| 6  | 6.117573000  | 12.785067000 | 6.719791000  |
| 1  | 7.210176000  | 12.831659000 | 6.809247000  |
| 1  | 5.878467000  | 12.200728000 | 5.820215000  |
| 1  | 5.738985000  | 12.228036000 | 7.582761000  |
| 6  | 7.308378000  | 8.783936000  | 7.399539000  |
| 1  | 8.339892000  | 8.564428000  | 7.703718000  |
| 1  | 6.924266000  | 9.597557000  | 8.020872000  |
| 1  | 7.338020000  | 9.138913000  | 6.355379000  |
| 6  | -0.318062000 | 13.501246000 | 1.973611000  |
| 1  | -0.276153000 | 13.906956000 | 0.954627000  |
| 6  | 3.738578000  | 6.310454000  | 7.520551000  |
| 1  | 4.072691000  | 5.646564000  | 6.712686000  |
| 6  | -1.619487000 | 12.518914000 | 7.451418000  |
| 1  | -1.947730000 | 12.108882000 | 8.414962000  |
| 6  | 3.155599000  | 15.936172000 | 6.629250000  |
| 1  | 3.549384000  | 16.308557000 | 5.672562000  |
| 6  | 3.904882000  | 10.445063000 | 10.226557000 |
| 1  | 3.855007000  | 10.342577000 | 11.326701000 |
| 1  | 4.732347000  | 11.126864000 | 10.001987000 |
| 6  | 7.911698000  | 11.149053000 | 2.925065000  |
| 1  | 8.477070000  | 11.003626000 | 1.995972000  |
| 6  | 0.226886000  | 10.714237000 | 9.303060000  |
| 1  | -0.577551000 | 10.046275000 | 9.657382000  |
| 1  | -0.090374000 | 11.728095000 | 9.601386000  |
| 6  | 2.265601000  | 7.715512000  | 0.437933000  |

|   |              |              |              |
|---|--------------|--------------|--------------|
| 1 | 2.365815000  | 6.644428000  | 0.193509000  |
| 1 | 1.235197000  | 7.987198000  | 0.140888000  |
| 6 | 6.438816000  | 7.536801000  | 7.500709000  |
| 1 | 6.425363000  | 7.200332000  | 8.545807000  |
| 6 | 3.823536000  | 14.630153000 | 2.285242000  |
| 1 | 4.369331000  | 15.579753000 | 2.217553000  |
| 1 | 4.251600000  | 13.927600000 | 1.563075000  |
| 1 | 4.039735000  | 14.214026000 | 3.292154000  |
| 6 | 3.466193000  | 13.388963000 | 9.216082000  |
| 1 | 3.266403000  | 14.421778000 | 9.542959000  |
| 1 | 4.540004000  | 13.218486000 | 9.425576000  |
| 6 | 4.214307000  | 9.092108000  | 9.587649000  |
| 1 | 5.217658000  | 8.795324000  | 9.942280000  |
| 1 | 3.525267000  | 8.335469000  | 10.001403000 |
| 6 | 2.327936000  | 14.825538000 | 2.054765000  |
| 1 | 1.939864000  | 15.480842000 | 2.845407000  |
| 6 | -1.133609000 | 12.215532000 | 1.952497000  |
| 1 | -2.168225000 | 12.416894000 | 1.647213000  |
| 1 | -1.161122000 | 11.770626000 | 2.959924000  |
| 1 | -0.704328000 | 11.473228000 | 1.274296000  |
| 6 | 2.613157000  | 12.482531000 | 10.105775000 |
| 1 | 2.893916000  | 12.599763000 | 11.167965000 |
| 1 | 1.575856000  | 12.810128000 | 10.004581000 |
| 6 | 7.711056000  | 8.227704000  | 2.549326000  |
| 1 | 8.220025000  | 8.067475000  | 3.509849000  |
| 6 | 0.262997000  | 7.066038000  | 3.369465000  |
| 1 | 0.078948000  | 6.747617000  | 4.404312000  |
| 6 | 2.508397000  | 5.225345000  | 2.771713000  |
| 1 | 1.845110000  | 4.982658000  | 1.932271000  |
| 6 | 3.797452000  | 16.738589000 | 7.762452000  |
| 1 | 3.565898000  | 17.804705000 | 7.639866000  |
| 1 | 4.886743000  | 16.646596000 | 7.792048000  |
| 1 | 3.407070000  | 16.436661000 | 8.738793000  |
| 6 | -0.914116000 | 14.544542000 | 2.914936000  |
| 1 | -1.966734000 | 14.730519000 | 2.666425000  |
| 1 | -0.389207000 | 15.503612000 | 2.862656000  |
| 1 | -0.863368000 | 14.187840000 | 3.951008000  |
| 6 | 3.951602000  | 5.003239000  | 2.340874000  |
| 1 | 4.097923000  | 3.965609000  | 2.014319000  |
| 1 | 4.635020000  | 5.195710000  | 3.173263000  |
| 1 | 4.235970000  | 5.666538000  | 1.520501000  |
| 6 | 7.229641000  | 12.508397000 | 2.859224000  |
| 1 | 7.974560000  | 13.313436000 | 2.821706000  |
| 1 | 6.599579000  | 12.673713000 | 3.737855000  |

|   |              |              |              |
|---|--------------|--------------|--------------|
| 1 | 6.590216000  | 12.584349000 | 1.976220000  |
| 6 | 2.033784000  | 15.465585000 | 0.698832000  |
| 1 | 2.544452000  | 16.435012000 | 0.624653000  |
| 1 | 0.966735000  | 15.654694000 | 0.550793000  |
| 1 | 2.385641000  | 14.847257000 | -0.131488000 |
| 6 | 5.833666000  | 10.004701000 | 0.246586000  |
| 1 | 6.096990000  | 8.982094000  | -0.076311000 |
| 1 | 6.688621000  | 10.636617000 | -0.057228000 |
| 6 | 6.949346000  | 6.409573000  | 6.606809000  |
| 1 | 8.003283000  | 6.195208000  | 6.825465000  |
| 1 | 6.871009000  | 6.697611000  | 5.552082000  |
| 1 | 6.389715000  | 5.479088000  | 6.744138000  |
| 6 | 4.071562000  | 5.649104000  | 8.857938000  |
| 1 | 3.559882000  | 4.680278000  | 8.932935000  |
| 1 | 3.749647000  | 6.254955000  | 9.708954000  |
| 1 | 5.142097000  | 5.455097000  | 8.969344000  |
| 6 | 2.010835000  | 12.018714000 | -0.047232000 |
| 1 | 2.768221000  | 12.704066000 | -0.467290000 |
| 1 | 1.041298000  | 12.397470000 | -0.415578000 |
| 6 | 6.157720000  | 15.050301000 | 5.571331000  |
| 1 | 7.249634000  | 15.064827000 | 5.679698000  |
| 1 | 5.813159000  | 16.088143000 | 5.610490000  |
| 1 | 5.936290000  | 14.662689000 | 4.572606000  |
| 6 | -1.788130000 | 9.678395000  | 6.344273000  |
| 1 | -1.073676000 | 8.908322000  | 6.028188000  |
| 6 | -0.492797000 | 6.137803000  | 2.415356000  |
| 1 | -1.575017000 | 6.266423000  | 2.546422000  |
| 1 | -0.272218000 | 5.079923000  | 2.582169000  |
| 1 | -0.265728000 | 6.368570000  | 1.368950000  |
| 6 | -2.847833000 | 12.942045000 | 6.648152000  |
| 1 | -3.257471000 | 13.871892000 | 7.063388000  |
| 1 | -3.648039000 | 12.199048000 | 6.672667000  |
| 1 | -2.590841000 | 13.136995000 | 5.601055000  |
| 6 | -0.702437000 | 13.713724000 | 7.689889000  |
| 1 | -1.191275000 | 14.450048000 | 8.341172000  |
| 1 | -0.472001000 | 14.196119000 | 6.736635000  |
| 1 | 0.258110000  | 13.429047000 | 8.128652000  |
| 6 | 2.196024000  | 10.629003000 | -0.661515000 |
| 1 | 1.304660000  | 10.036911000 | -0.430437000 |
| 1 | 2.261609000  | 10.707184000 | -1.762947000 |
| 6 | 2.239946000  | 6.551079000  | 7.352951000  |
| 1 | 1.672501000  | 5.616599000  | 7.447781000  |
| 1 | 1.981123000  | 6.969385000  | 6.354338000  |
| 1 | 1.859963000  | 7.268058000  | 8.087537000  |



|   |              |              |              |
|---|--------------|--------------|--------------|
| 6 | 8.866352000  | 11.030918000 | 4.111391000  |
| 1 | 9.633386000  | 11.814654000 | 4.069937000  |
| 1 | 9.384155000  | 10.066381000 | 4.136588000  |
| 1 | 8.330740000  | 11.146426000 | 5.059970000  |
| 6 | -0.216560000 | 8.503416000  | 3.195265000  |
| 1 | -1.298315000 | 8.567332000  | 3.348067000  |
| 1 | 0.001948000  | 8.863311000  | 2.184495000  |
| 1 | 0.270995000  | 9.192983000  | 3.906244000  |
| 6 | 1.641715000  | 16.110582000 | 6.614172000  |
| 1 | 1.376082000  | 17.168183000 | 6.488429000  |
| 1 | 1.198262000  | 15.762852000 | 7.551638000  |
| 1 | 1.190499000  | 15.535264000 | 5.798881000  |
| 6 | 3.271548000  | 8.465716000  | -0.443151000 |
| 1 | 3.039913000  | 8.318505000  | -1.514154000 |
| 1 | 4.256329000  | 8.031248000  | -0.253222000 |
| 6 | 4.624743000  | 10.494414000 | -0.560385000 |
| 1 | 4.541799000  | 11.576177000 | -0.415369000 |
| 1 | 4.792532000  | 10.318433000 | -1.639082000 |
| 6 | 8.771682000  | 8.399579000  | 1.460545000  |
| 1 | 9.318944000  | 7.457349000  | 1.327327000  |
| 1 | 9.510400000  | 9.167106000  | 1.708357000  |
| 1 | 8.329038000  | 8.656805000  | 0.493608000  |
| 6 | 2.145935000  | 4.349357000  | 3.970080000  |
| 1 | 2.299863000  | 3.289428000  | 3.731820000  |
| 1 | 1.104415000  | 4.468809000  | 4.284433000  |
| 1 | 2.783341000  | 4.592558000  | 4.827870000  |
| 6 | -2.483896000 | 9.184131000  | 7.611116000  |
| 1 | -3.095589000 | 8.300447000  | 7.386229000  |
| 1 | -3.155588000 | 9.941143000  | 8.031767000  |
| 1 | -1.761335000 | 8.899842000  | 8.378927000  |
| 6 | 6.808753000  | 7.028528000  | 2.286956000  |
| 1 | 7.392468000  | 6.099644000  | 2.254301000  |
| 1 | 6.283783000  | 7.128854000  | 1.331626000  |
| 1 | 6.048182000  | 6.942387000  | 3.068282000  |
| 6 | -2.787454000 | 9.906812000  | 5.209106000  |
| 1 | -3.184395000 | 8.946109000  | 4.857246000  |
| 1 | -2.339017000 | 10.416419000 | 4.351658000  |
| 1 | -3.643498000 | 10.502596000 | 5.535067000  |

Optimized structure of complex **3** assuming  $5f^1$  configuration ( $U^V$ )

|    |             |              |             |
|----|-------------|--------------|-------------|
| 92 | 2.609217000 | 10.810824000 | 7.168953000 |
| 92 | 3.402837000 | 10.294761000 | 2.462830000 |
| 45 | 4.967822000 | 10.532850000 | 4.574868000 |
| 45 | 2.968517000 | 12.270838000 | 4.614937000 |

|    |              |              |              |
|----|--------------|--------------|--------------|
| 45 | 2.973119000  | 8.799361000  | 4.990984000  |
| 45 | 0.983887000  | 10.561270000 | 5.108418000  |
| 15 | 2.035829000  | 13.218231000 | 2.657485000  |
| 15 | 2.011932000  | 7.486657000  | 3.248328000  |
| 15 | 3.950865000  | 13.611729000 | 6.304014000  |
| 15 | -0.562708000 | 10.612608000 | 6.825762000  |
| 15 | 3.873609000  | 7.873123000  | 6.971609000  |
| 15 | 6.577757000  | 10.343956000 | 2.930150000  |
| 7  | 2.484245000  | 8.353494000  | 1.784764000  |
| 7  | 3.417425000  | 12.826564000 | 7.787898000  |
| 7  | 2.697095000  | 11.123161000 | 9.837610000  |
| 7  | 3.433320000  | 10.017790000 | -0.208848000 |
| 7  | 2.472935000  | 12.053331000 | 1.402347000  |
| 7  | 3.641864000  | 9.115240000  | 8.207706000  |
| 7  | 0.562380000  | 10.750402000 | 8.158834000  |
| 7  | 5.503225000  | 10.199851000 | 1.562274000  |
| 6  | 5.823153000  | 13.815839000 | 6.632274000  |
| 1  | 5.882658000  | 14.402313000 | 7.558147000  |
| 6  | 1.454331000  | 10.557150000 | 10.397137000 |
| 1  | 1.323353000  | 10.865254000 | 11.448172000 |
| 1  | 1.553401000  | 9.468904000  | 10.380933000 |
| 6  | 6.486624000  | 12.467470000 | 6.867888000  |
| 1  | 7.566754000  | 12.587320000 | 7.024827000  |
| 1  | 6.341533000  | 11.800576000 | 5.997337000  |
| 1  | 6.073275000  | 11.958910000 | 7.743733000  |
| 6  | 6.612667000  | 8.596867000  | 7.028019000  |
| 1  | 7.667203000  | 8.304295000  | 7.118272000  |
| 1  | 6.411872000  | 9.381452000  | 7.762567000  |
| 1  | 6.459643000  | 9.039287000  | 6.030169000  |
| 6  | 0.170216000  | 13.479274000 | 2.324140000  |
| 1  | 0.112242000  | 13.813440000 | 1.280376000  |
| 6  | 2.979531000  | 6.307993000  | 7.651772000  |
| 1  | 3.095510000  | 5.610017000  | 6.813212000  |
| 6  | -1.773982000 | 12.066731000 | 7.063868000  |
| 1  | -2.289500000 | 11.891430000 | 8.016295000  |
| 6  | 3.391073000  | 15.461713000 | 6.386902000  |
| 1  | 3.649537000  | 15.790549000 | 5.370479000  |
| 6  | 3.890989000  | 10.373298000 | 10.267777000 |
| 1  | 3.934020000  | 10.292755000 | 11.367372000 |
| 1  | 4.767339000  | 10.944952000 | 9.943911000  |
| 6  | 7.845089000  | 11.667264000 | 2.400848000  |
| 1  | 8.406535000  | 11.215532000 | 1.574126000  |
| 6  | 0.234283000  | 10.932478000 | 9.553985000  |
| 1  | -0.590161000 | 10.287323000 | 9.889442000  |

|   |              |              |              |
|---|--------------|--------------|--------------|
| 1 | -0.083037000 | 11.966724000 | 9.780250000  |
| 6 | 2.228521000  | 7.932457000  | 0.422401000  |
| 1 | 2.314340000  | 6.843092000  | 0.292429000  |
| 1 | 1.206812000  | 8.192835000  | 0.096512000  |
| 6 | 5.703553000  | 7.393935000  | 7.238623000  |
| 1 | 5.764433000  | 7.091146000  | 8.291900000  |
| 6 | 4.216243000  | 14.899163000 | 2.046362000  |
| 1 | 4.637477000  | 15.908117000 | 1.949655000  |
| 1 | 4.560106000  | 14.310211000 | 1.189801000  |
| 1 | 4.616534000  | 14.434930000 | 2.952293000  |
| 6 | 3.735828000  | 13.269490000 | 9.130269000  |
| 1 | 3.590000000  | 14.349274000 | 9.264591000  |
| 1 | 4.791156000  | 13.076572000 | 9.392267000  |
| 6 | 3.942644000  | 8.988444000  | 9.617398000  |
| 1 | 4.946138000  | 8.573128000  | 9.801194000  |
| 1 | 3.240963000  | 8.312345000  | 10.131173000 |
| 6 | 2.696862000  | 14.943477000 | 2.106631000  |
| 1 | 2.411430000  | 15.556342000 | 2.973185000  |
| 6 | -0.590733000 | 12.172074000 | 2.457871000  |
| 1 | -1.661502000 | 12.322766000 | 2.266751000  |
| 1 | -0.476643000 | 11.760749000 | 3.474750000  |
| 1 | -0.219466000 | 11.420039000 | 1.757811000  |
| 6 | 2.808719000  | 12.565721000 | 10.119922000 |
| 1 | 3.131892000  | 12.738241000 | 11.160348000 |
| 1 | 1.808047000  | 12.993321000 | 10.008660000 |
| 6 | 7.691310000  | 8.776924000  | 2.961190000  |
| 1 | 8.098028000  | 8.789644000  | 3.981033000  |
| 6 | 0.097636000  | 7.298441000  | 3.085118000  |
| 1 | -0.198685000 | 6.974514000  | 4.090743000  |
| 6 | 2.527366000  | 5.673765000  | 2.884167000  |
| 1 | 2.021132000  | 5.388558000  | 1.954421000  |
| 6 | 4.069575000  | 16.407991000 | 7.380089000  |
| 1 | 3.748276000  | 17.439173000 | 7.181002000  |
| 1 | 5.160819000  | 16.394837000 | 7.315916000  |
| 1 | 3.791556000  | 16.187259000 | 8.415036000  |
| 6 | -0.411480000 | 14.566055000 | 3.223803000  |
| 1 | -1.475388000 | 14.716525000 | 3.000884000  |
| 1 | 0.088999000  | 15.531748000 | 3.102562000  |
| 1 | -0.331183000 | 14.275718000 | 4.274939000  |
| 6 | 4.028365000  | 5.565491000  | 2.677684000  |
| 1 | 4.312422000  | 4.535931000  | 2.423523000  |
| 1 | 4.557199000  | 5.848638000  | 3.592042000  |
| 1 | 4.371839000  | 6.225784000  | 1.877318000  |
| 6 | 7.159923000  | 12.922453000 | 1.881897000  |

|   |              |              |              |
|---|--------------|--------------|--------------|
| 1 | 7.905135000  | 13.664901000 | 1.568737000  |
| 1 | 6.530234000  | 13.377549000 | 2.648411000  |
| 1 | 6.513405000  | 12.701644000 | 1.028695000  |
| 6 | 2.107059000  | 15.583424000 | 0.849235000  |
| 1 | 2.520189000  | 16.592782000 | 0.720557000  |
| 1 | 1.019130000  | 15.686034000 | 0.889808000  |
| 1 | 2.359402000  | 15.019275000 | -0.053470000 |
| 6 | 5.885626000  | 10.025259000 | 0.180697000  |
| 1 | 6.130057000  | 8.974829000  | -0.056965000 |
| 1 | 6.779444000  | 10.607314000 | -0.094901000 |
| 6 | 6.098141000  | 6.206460000  | 6.365424000  |
| 1 | 7.139399000  | 5.919383000  | 6.559622000  |
| 1 | 6.013873000  | 6.457480000  | 5.305133000  |
| 1 | 5.474780000  | 5.326019000  | 6.550987000  |
| 6 | 3.538491000  | 5.627808000  | 8.902651000  |
| 1 | 2.984131000  | 4.699774000  | 9.096768000  |
| 1 | 3.437928000  | 6.250974000  | 9.795483000  |
| 1 | 4.592726000  | 5.354252000  | 8.801280000  |
| 6 | 2.274903000  | 12.213394000 | -0.023464000 |
| 1 | 3.037384000  | 12.870639000 | -0.473857000 |
| 1 | 1.303946000  | 12.670836000 | -0.268049000 |
| 6 | 6.493620000  | 14.591694000 | 5.503884000  |
| 1 | 7.562916000  | 14.729466000 | 5.708523000  |
| 1 | 6.055996000  | 15.583624000 | 5.354269000  |
| 1 | 6.398974000  | 14.040974000 | 4.564636000  |
| 6 | -1.637235000 | 9.078122000  | 7.280856000  |
| 1 | -0.881686000 | 8.436824000  | 7.750393000  |
| 6 | -0.417391000 | 6.270498000  | 2.073658000  |
| 1 | -1.515219000 | 6.275739000  | 2.080257000  |
| 1 | -0.102691000 | 5.247465000  | 2.293609000  |
| 1 | -0.103953000 | 6.507481000  | 1.052323000  |
| 6 | -2.801518000 | 12.097270000 | 5.934266000  |
| 1 | -3.497459000 | 12.934733000 | 6.071067000  |
| 1 | -3.396132000 | 11.179976000 | 5.885612000  |
| 1 | -2.309225000 | 12.224293000 | 4.965116000  |
| 6 | -0.987115000 | 13.366960000 | 7.151280000  |
| 1 | -1.663161000 | 14.231053000 | 7.178566000  |
| 1 | -0.323813000 | 13.469330000 | 6.287350000  |
| 1 | -0.356162000 | 13.397499000 | 8.043248000  |
| 6 | 2.310092000  | 10.838831000 | -0.699366000 |
| 1 | 1.386204000  | 10.306665000 | -0.449611000 |
| 1 | 2.347808000  | 10.942161000 | -1.797347000 |
| 6 | 1.496047000  | 6.632949000  | 7.793535000  |
| 1 | 0.913365000  | 5.728100000  | 8.009121000  |

|   |              |              |              |
|---|--------------|--------------|--------------|
| 1 | 1.112996000  | 7.089529000  | 6.873715000  |
| 1 | 1.327384000  | 7.346189000  | 8.608792000  |
| 6 | 8.812836000  | 11.962605000 | 3.545987000  |
| 1 | 9.573017000  | 12.687752000 | 3.229176000  |
| 1 | 9.337125000  | 11.065166000 | 3.891191000  |
| 1 | 8.283826000  | 12.385040000 | 4.404957000  |
| 6 | -0.517946000 | 8.660502000  | 2.806176000  |
| 1 | -1.613511000 | 8.609434000  | 2.826354000  |
| 1 | -0.213328000 | 9.033403000  | 1.822806000  |
| 1 | -0.201108000 | 9.401557000  | 3.559978000  |
| 6 | 1.875567000  | 15.513838000 | 6.525128000  |
| 1 | 1.507126000  | 16.541979000 | 6.416386000  |
| 1 | 1.557746000  | 15.141676000 | 7.504547000  |
| 1 | 1.400238000  | 14.891055000 | 5.762838000  |
| 6 | 3.252653000  | 8.584053000  | -0.507621000 |
| 1 | 2.979211000  | 8.436392000  | -1.565973000 |
| 1 | 4.218556000  | 8.098045000  | -0.343224000 |
| 6 | 4.734725000  | 10.510595000 | -0.703111000 |
| 1 | 4.707744000  | 11.602747000 | -0.657960000 |
| 1 | 4.886586000  | 10.221664000 | -1.756825000 |
| 6 | 8.852899000  | 8.722357000  | 1.968174000  |
| 1 | 9.372737000  | 7.760128000  | 2.063745000  |
| 1 | 9.597776000  | 9.505704000  | 2.133590000  |
| 1 | 8.507021000  | 8.797785000  | 0.931520000  |
| 6 | 2.056627000  | 4.758286000  | 4.011052000  |
| 1 | 2.353373000  | 3.720327000  | 3.813607000  |
| 1 | 0.971068000  | 4.771576000  | 4.148007000  |
| 1 | 2.510566000  | 5.062935000  | 4.958808000  |
| 6 | -2.774382000 | 9.316572000  | 8.276434000  |
| 1 | -3.224319000 | 8.356028000  | 8.559216000  |
| 1 | -3.573559000 | 9.926263000  | 7.841571000  |
| 1 | -2.449080000 | 9.805846000  | 9.197872000  |
| 6 | 6.788893000  | 7.561179000  | 2.812483000  |
| 1 | 7.323173000  | 6.639006000  | 3.072077000  |
| 1 | 6.437811000  | 7.464695000  | 1.780047000  |
| 1 | 5.904863000  | 7.650227000  | 3.450950000  |
| 6 | -2.160012000 | 8.373575000  | 6.032362000  |
| 1 | -2.655420000 | 7.431396000  | 6.300968000  |
| 1 | -1.347384000 | 8.150064000  | 5.340788000  |
| 1 | -2.891354000 | 8.988093000  | 5.495736000  |

**Optimized structure of complex 2**

|   |          |           |           |
|---|----------|-----------|-----------|
| 6 | 3.280545 | 10.914647 | 14.989778 |
| 1 | 2.831747 | 10.087988 | 15.631531 |
| 1 | 4.288986 | 10.916806 | 14.541788 |

|   |           |           |           |
|---|-----------|-----------|-----------|
| 6 | 3.160219  | 12.199719 | 15.756460 |
| 1 | 3.890158  | 12.920292 | 15.395855 |
| 1 | 3.378552  | 11.998193 | 16.802249 |
| 6 | 1.991716  | 9.407886  | 13.599739 |
| 1 | 2.771153  | 8.747330  | 13.984827 |
| 1 | 1.854121  | 9.181270  | 12.548066 |
| 6 | 0.685525  | 9.129412  | 14.336541 |
| 1 | 0.308776  | 8.155171  | 14.049518 |
| 1 | 0.850358  | 9.129868  | 15.412147 |
| 6 | 3.218792  | 11.300149 | 12.583305 |
| 1 | 4.055138  | 10.623795 | 12.397260 |
| 1 | 3.623309  | 12.276912 | 12.832643 |
| 6 | 2.376956  | 11.402659 | 11.324660 |
| 1 | 2.880067  | 12.029276 | 10.590014 |
| 1 | 2.245138  | 10.412682 | 10.891122 |
| 6 | -2.101113 | 16.273775 | 15.399747 |
| 1 | -2.612946 | 15.712587 | 14.629936 |
| 6 | -2.520662 | 15.987615 | 16.691930 |
| 1 | -3.289415 | 15.231255 | 16.752065 |
| 6 | -2.545063 | 17.009603 | 17.819781 |
| 1 | -3.416628 | 16.835697 | 18.442653 |
| 1 | -2.627708 | 18.007535 | 17.402490 |
| 6 | -1.278515 | 16.916134 | 18.682500 |
| 1 | -1.424983 | 16.161164 | 19.448443 |
| 1 | -1.108550 | 17.868529 | 19.183200 |
| 6 | -0.046573 | 16.554736 | 17.867944 |
| 1 | 0.805564  | 16.284799 | 18.476476 |
| 6 | 0.303726  | 17.087482 | 16.595117 |
| 1 | 1.371450  | 17.130290 | 16.435462 |
| 6 | -0.458850 | 18.180559 | 15.869129 |
| 1 | 0.235741  | 18.774092 | 15.284937 |
| 1 | -0.929365 | 18.835156 | 16.596657 |
| 6 | -1.532659 | 17.598481 | 14.924491 |
| 1 | -2.345401 | 18.315883 | 14.823004 |
| 1 | -1.096111 | 17.452513 | 13.942824 |
| 6 | 1.453503  | 13.011273 | 18.460457 |
| 1 | 2.440625  | 12.573861 | 18.580887 |
| 6 | 0.452372  | 11.865804 | 18.417785 |
| 1 | 0.459918  | 11.345049 | 19.373149 |
| 1 | 0.716682  | 11.169090 | 17.627830 |
| 1 | -0.547086 | 12.246526 | 18.228976 |
| 6 | 1.195048  | 13.908614 | 19.696975 |
| 1 | 0.167810  | 14.262038 | 19.679957 |
| 1 | 1.867713  | 14.762348 | 19.687076 |

|   |           |           |           |
|---|-----------|-----------|-----------|
| 1 | 1.365116  | 13.326953 | 20.599766 |
| 6 | 2.991024  | 15.075050 | 17.010921 |
| 1 | 2.624288  | 15.959410 | 17.522141 |
| 6 | 4.216122  | 14.614039 | 17.821108 |
| 1 | 4.884470  | 14.039477 | 17.185698 |
| 1 | 3.912819  | 13.996739 | 18.661349 |
| 1 | 4.740030  | 15.489074 | 18.196343 |
| 6 | 3.416551  | 15.578200 | 15.612141 |
| 1 | 4.043339  | 16.460034 | 15.725420 |
| 1 | 2.540036  | 15.834429 | 15.024523 |
| 1 | 3.973975  | 14.804103 | 15.093950 |
| 6 | -0.042523 | 13.902893 | 9.916306  |
| 1 | -0.432247 | 14.600375 | 10.648277 |
| 6 | -0.802119 | 14.180606 | 8.614554  |
| 1 | -0.901178 | 15.254518 | 8.482603  |
| 1 | -1.790365 | 13.734495 | 8.651576  |
| 1 | -0.259161 | 13.765572 | 7.768669  |
| 6 | 1.456765  | 14.260508 | 9.760559  |
| 1 | 1.915108  | 13.626066 | 9.006038  |
| 1 | 1.964983  | 14.116156 | 10.708928 |
| 1 | 1.540754  | 15.301467 | 9.457749  |
| 6 | -0.270933 | 10.944482 | 9.297447  |
| 1 | -0.213869 | 9.965749  | 9.761299  |
| 6 | 0.919364  | 11.035599 | 8.309152  |
| 1 | 0.757755  | 10.333507 | 7.494789  |
| 1 | 1.846464  | 10.789448 | 8.817000  |
| 1 | 0.991240  | 12.041693 | 7.907929  |
| 6 | -1.598060 | 10.982045 | 8.513865  |
| 1 | -1.513097 | 11.669835 | 7.677811  |
| 1 | -2.408566 | 11.309379 | 9.158681  |
| 1 | -1.821679 | 9.987757  | 8.138039  |
| 6 | -1.602296 | 8.565921  | 11.924091 |
| 1 | -0.662930 | 8.704971  | 11.395016 |
| 6 | -1.535577 | 7.159899  | 12.518064 |
| 1 | -2.471152 | 6.918498  | 13.016008 |
| 1 | -0.728340 | 7.082330  | 13.237514 |
| 1 | -1.364843 | 6.443142  | 11.717944 |
| 6 | -2.685398 | 8.627419  | 10.848879 |
| 1 | -2.336919 | 8.120932  | 9.951753  |
| 1 | -2.917139 | 9.659976  | 10.604638 |
| 1 | -3.590251 | 8.140652  | 11.199715 |
| 6 | -3.003199 | 9.612335  | 14.393570 |
| 1 | -3.287775 | 10.562267 | 14.828366 |
| 6 | -2.426409 | 8.776584  | 15.559164 |

|    |            |           |           |
|----|------------|-----------|-----------|
| 1  | -3.214442  | 8.597242  | 16.286590 |
| 1  | -1.614323  | 9.320211  | 16.032271 |
| 1  | -2.053077  | 7.824074  | 15.190950 |
| 6  | -4.306539  | 8.978289  | 13.860047 |
| 1  | -4.364261  | 9.065889  | 12.781411 |
| 1  | -5.158154  | 9.490714  | 14.294852 |
| 1  | -4.343891  | 7.925495  | 14.128550 |
| 17 | -1.616852  | 13.062506 | 15.789765 |
| 17 | 0.450541   | 15.126826 | 13.414552 |
| 17 | -3.033510  | 14.066290 | 11.097082 |
| 7  | 1.791976   | 12.795880 | 15.648173 |
| 7  | -0.269580  | 10.175599 | 13.979963 |
| 7  | 1.092501   | 11.970740 | 11.687174 |
| 7  | 2.432844   | 10.801287 | 13.743509 |
| 15 | 1.476000   | 13.957360 | 16.845421 |
| 15 | -1.695934  | 10.036569 | 13.104005 |
| 15 | -0.265542  | 12.181367 | 10.709010 |
| 45 | -0.482351  | 15.145867 | 16.365205 |
| 45 | -2.127722  | 12.061166 | 12.067340 |
| 92 | 0.292127   | 12.429464 | 13.825572 |
| 6  | -10.675162 | 15.298999 | 9.137165  |
| 1  | -10.226970 | 16.125456 | 8.494770  |
| 1  | -11.683149 | 15.297030 | 9.586233  |
| 6  | -10.555827 | 14.013888 | 8.370894  |
| 1  | -11.285136 | 13.293055 | 8.732321  |
| 1  | -10.775705 | 14.215364 | 7.325257  |
| 6  | -9.384189  | 16.806216 | 10.525459 |
| 1  | -10.163916 | 17.467492 | 10.141783 |
| 1  | -9.244850  | 17.032653 | 11.577109 |
| 6  | -8.080419  | 17.083913 | 9.786124  |
| 1  | -7.702576  | 18.057968 | 10.072495 |
| 1  | -8.247409  | 17.084420 | 8.710873  |
| 6  | -10.609003 | 14.914252 | 11.544328 |
| 1  | -11.445009 | 15.590662 | 11.731645 |
| 1  | -11.013856 | 13.937458 | 11.295778 |
| 6  | -9.765583  | 14.811536 | 12.803523 |
| 1  | -10.267399 | 14.184982 | 13.538760 |
| 1  | -9.633575  | 15.801682 | 13.236618 |
| 6  | -5.293188  | 9.939437  | 8.725543  |
| 1  | -4.780304  | 10.500828 | 9.494505  |
| 6  | -4.874734  | 10.224438 | 7.433440  |
| 1  | -4.105744  | 10.980375 | 7.372145  |
| 6  | -4.851871  | 9.201826  | 6.306132  |
| 1  | -3.980664  | 9.375025  | 5.682570  |



|   |            |           |           |
|---|------------|-----------|-----------|
| 1 | -4.769399  | 8.204148  | 6.724064  |
| 6 | -6.119033  | 9.295090  | 5.443777  |
| 1 | -5.972887  | 10.049429 | 4.677176  |
| 1 | -6.289467  | 8.342357  | 4.943908  |
| 6 | -7.350072  | 9.657491  | 6.258766  |
| 1 | -8.202445  | 9.927126  | 5.650531  |
| 6 | -7.700178  | 9.126473  | 7.532504  |
| 1 | -8.767796  | 9.084419  | 7.693033  |
| 6 | -6.937253  | 8.033456  | 8.258708  |
| 1 | -7.631715  | 7.440680  | 8.843879  |
| 1 | -6.467738  | 7.378178  | 7.531156  |
| 6 | -5.862162  | 8.615220  | 9.202103  |
| 1 | -5.049792  | 7.897349  | 9.303314  |
| 1 | -6.297854  | 8.761871  | 10.184034 |
| 6 | -8.854554  | 13.200148 | 5.664484  |
| 1 | -9.841818  | 13.637486 | 5.544930  |
| 6 | -7.853455  | 14.345518 | 5.705142  |
| 1 | -7.862195  | 14.866036 | 4.749627  |
| 1 | -8.116656  | 15.042510 | 6.495298  |
| 1 | -6.853722  | 13.964590 | 5.892665  |
| 6 | -8.598414  | 12.301861 | 4.427756  |
| 1 | -7.571065  | 11.948374 | 4.443046  |
| 1 | -9.271118  | 11.448161 | 4.439700  |
| 1 | -8.769998  | 12.882482 | 3.524590  |
| 6 | -10.388409 | 11.138694 | 7.116394  |
| 1 | -10.022410 | 10.254205 | 6.604830  |
| 6 | -11.614136 | 11.599976 | 6.307445  |
| 1 | -12.281625 | 12.174786 | 6.943550  |
| 1 | -11.311174 | 12.217181 | 5.467027  |
| 1 | -12.138828 | 10.725187 | 5.932608  |
| 6 | -10.813080 | 10.635647 | 8.515433  |
| 1 | -11.440301 | 9.753989  | 8.402726  |
| 1 | -9.936242  | 10.379129 | 9.102257  |
| 1 | -11.369795 | 11.410028 | 9.033975  |
| 6 | -7.339639  | 12.306366 | 14.207100 |
| 1 | -6.949692  | 11.610400 | 13.474505 |
| 6 | -6.575547  | 12.030665 | 15.506127 |
| 1 | -6.473043  | 10.956954 | 15.636491 |
| 1 | -5.588600  | 12.479666 | 15.466636 |
| 1 | -7.117465  | 12.443584 | 16.353670 |
| 6 | -8.837652  | 11.945273 | 14.364979 |
| 1 | -9.296461  | 12.577750 | 15.120815 |
| 1 | -9.347989  | 12.089007 | 13.417779 |
| 1 | -8.917778  | 10.903846 | 14.667042 |

|    |           |           |           |
|----|-----------|-----------|-----------|
| 6  | -7.119500 | 15.266442 | 14.828581 |
| 1  | -7.178755 | 16.245436 | 14.365543 |
| 6  | -8.307619 | 15.174415 | 15.819813 |
| 1  | -8.144832 | 15.876187 | 16.634180 |
| 1  | -9.235937 | 15.420259 | 15.314118 |
| 1  | -8.378044 | 14.168149 | 16.220836 |
| 6  | -5.790220 | 15.228216 | 15.607242 |
| 1  | -5.872193 | 14.539339 | 16.442645 |
| 1  | -4.981337 | 14.901901 | 14.959017 |
| 1  | -5.565831 | 16.222200 | 15.983218 |
| 6  | -5.791434 | 17.646536 | 12.200194 |
| 1  | -6.730008 | 17.506132 | 12.730337 |
| 6  | -5.860651 | 19.051073 | 11.603906 |
| 1  | -4.925776 | 19.293110 | 11.104977 |
| 1  | -6.668444 | 19.126233 | 10.884846 |
| 1  | -6.032005 | 19.768572 | 12.403260 |
| 6  | -4.707411 | 17.591214 | 13.276022 |
| 1  | -5.057230 | 18.099088 | 14.171988 |
| 1  | -4.472125 | 16.560764 | 13.522857 |
| 1  | -3.804206 | 18.080060 | 12.923813 |
| 6  | -4.394510 | 16.604601 | 9.728249  |
| 1  | -4.109364 | 15.654866 | 9.292791  |
| 6  | -4.974343 | 17.440185 | 8.563746  |
| 1  | -4.188007 | 17.621385 | 7.834955  |
| 1  | -5.786426 | 16.895598 | 8.091537  |
| 1  | -5.348602 | 18.391847 | 8.933198  |
| 6  | -3.091066 | 17.241622 | 10.258873 |
| 1  | -3.030982 | 17.153976 | 11.337387 |
| 1  | -2.239096 | 16.731218 | 9.822273  |
| 1  | -3.056091 | 18.294563 | 9.990536  |
| 17 | -5.778118 | 13.150915 | 8.331890  |
| 17 | -7.838316 | 11.087328 | 10.711182 |
| 17 | -4.357495 | 12.147052 | 13.026230 |
| 7  | -9.186768 | 13.418817 | 8.480090  |
| 7  | -7.126100 | 16.035069 | 10.142870 |
| 7  | -8.481011 | 14.242828 | 12.441774 |
| 7  | -9.825386 | 15.412552 | 10.382623 |
| 15 | -8.872699 | 12.256137 | 7.280240  |
| 15 | -5.697924 | 16.176242 | 11.018516 |
| 15 | -7.123180 | 14.031383 | 13.416418 |
| 45 | -6.913072 | 11.067042 | 7.760660  |
| 45 | -5.263018 | 14.152377 | 12.055387 |
| 92 | -7.684820 | 13.784369 | 10.298087 |

## 5. References

1. Feng G, et al. (2019) Transition metal bridged bimetallic clusters with multiple uranium-metal bonds. *Nat Chem* 11:248-253.
2. Sheldrick GM (2000) SADABS, *Program for Empirical Absorption Correction of Area Detector Data*, University of Göttingen, Germany,.
3. Siemens (2000) *SHELXTL, Version 6.10*, Software Reference Manual, Siemens Analytical X-ray Systems, Inc., Madison, Wisconsin, USA,
4. Gaussian09, Revision A.02 (2009) Frisch MJ, Trucks GW, Schlegel HB, Scuseria GE, Robb MA, Cheeseman JR, Scalmani G, Barone V, Mennucci B, Petersson GA, Nakatsuji H, Caricato M, Li X, Hratchian HP, Izmaylov AF, Bloino J, Zheng G, Sonnenberg JL, Hada M, Ehara M, Toyota K, Fukuda R, Hasegawa J, Ishida M, Nakajima T, Honda Y, Kitao O, Nakai H, Vreven T, Montgomery JA, Jr., Peralta JE, Ogliaro F, Bearpark M, Heyd JJ, Brothers E, Kudin KN, Staroverov VN, Kobayashi R, Normand J, Raghavachari K, Rendell A, Burant JC, Iyengar SS, Tomasi J, Cossi M, Rega N, Millam JM, Klene M, Knox JE, Cross JB, Bakken V, Adamo C, Jaramillo J, Gomperts R, Stratmann RE, Yazyev O, Austin AJ, Cammi R, Pomelli C, Ochterski JW, Martin RL, Morokuma K, Zakrzewski VG, Voth GA, Salvador P, Dannenberg JJ, Dapprich S, Daniels AD, Farkas O, Foresman JB, Ortiz JV, Cioslowski J, Fox DJ, Gaussian, Inc., Wallingford CT.
5. Becke AD (1993) Density-functional thermochemistry. III. The role of exact Exchange. *J Chem Phys* 98:5648–5652.
6. Perdew JP, Wang Y (1992) Accurate and simple analytic representation of the electron-gas correlation energy. *Phys Rev B* 45:13244–13249.
7. Cao X, Dolg M (2004) Segmented contraction scheme for small-core actinide pseudopotential basis set. *J Mol Struct: Theochem* 673:203–209.
8. Cao X, Dolg M, Stoll H (2003) Valence basis sets for relativistic energyconsistent small-core actinide pseudopotentials. *J Chem Phys* 118:487–496.
9. Kuechle W, Dolg M, Stoll H, Preuss H (1994) Energy-adjusted pseudopotentials for the actinides. Parameter sets and test calculations for thorium and thorium monoxide. *J Chem Phys* 100:7535–7542.
10. Leininger T, Nicklass A, Kuechle W, Stoll H, Dolg M, Bergner A (1996) The accuracy of the pseudopotential approximation: Non-frozen-core effects for spectroscopic constants of alkali fluorides XF (X = K, Rb, Cs). *Chem Phys Lett* 255:274–280.
11. Dolg M, Wedig U, Stoll H, Preuss H (1987) Energy-adjusted ab initio pseudopotentials for the first row transition elements. *J Chem Phys* 86:866–872.
12. Hehre WJ, Ditchfield R, Pople JA (1972) Self-consistent molecular orbital methods. XII. Further extensions of Gaussian-type basis sets for use in molecular orbital studies of organic molecules *J Chem Phys* 56:2257–2261.
13. Hariharan PC, Pople JA (1973) The influence of polarization functions on molecular orbital hydrogenation energies. *Theor Chim Acta* 28:213–222.
14. Schlegel HB (1982) Optimization of equilibrium geometries and transition structures. *J Comput Chem* 3:214–218.

15. Reed AE, Curtiss LA, Weinhold F (1988) Intermolecular interactions from a natural bond orbital, donor-acceptor viewpoint. *Chem Rev* 88:899–926.
16. Zhurko GA *Home Page: a set of graphical tools for facilitating working with quantum chemistry computations* (<http://www.chemcraftprog.com>).
